1 **Main Manuscript for**

2 **A 3D Structural Interactome to Explore the Impact of Evolutionary Divergence,**  
3 **Population Variation, and Small-molecule Drugs on SARS-CoV-2-Human Protein-**  
4 **Protein Interactions**

5 Shayne D. Wierbowski<sup>1,2</sup>, Siqi Liang<sup>1,2</sup>, You Chen<sup>2,3</sup>, Nicole M. Andre<sup>4</sup>, Steven M. Lipkin<sup>5</sup>, Gary R.  
6 Whittaker<sup>4,6</sup>, Haiyuan Yu<sup>1,2,†</sup>

7 1. Department of Computational Biology, Cornell University, Ithaca, NY 14853, USA

8 2. Weill Institute for Cell and Molecular Biology, Cornell University, Ithaca, NY 14853, USA

9 3. Department of Molecular Biology and Genetics, Cornell University, Ithaca, NY 14853, USA

10 4. Department of Microbiology and Immunology, Cornell University, Ithaca NY 14853, USA

11 5. Department of Medicine, Weill-Cornell Medicine, New York, NY 10021

12 6. Master of Public Health Program, Cornell University, Ithaca NY 14853, USA

13 † Correspondence should be addressed to H.Y. ([haiyuan.yu@cornell.edu](mailto:haiyuan.yu@cornell.edu))

14 **Abstract**

15 The recent COVID-19 pandemic has sparked a global public health crisis. Vital to the development of  
16 informed treatments for this disease is a comprehensive understanding of the molecular interactions  
17 involved in disease pathology. One lens through which we can better understand this pathology is  
18 through the network of protein-protein interactions between its viral agent, SARS-CoV-2, and its human  
19 host. For instance, increased infectivity of SARS-CoV-2 compared to SARS-CoV can be explained by  
20 rapid evolution along the interface between the Spike protein and its human receptor (ACE2) leading to  
21 increased binding affinity. Sequence divergences that modulate other protein-protein interactions may  
22 further explain differences in transmission and virulence in this novel coronavirus. To facilitate these  
23 comparisons, we combined homology-based structural modeling with the ECLAIR pipeline for interface  
24 prediction at residue resolution, and molecular docking with PyRosetta. This enabled us to compile a  
25 novel 3D structural interactome meta-analysis for the published interactome network between SARS-  
26 CoV-2 and human. This resource includes docked structures for all interactions with protein structures,  
27 enrichment analysis of variation along interfaces, predicted  $\Delta\Delta G$  between SARS-CoV and SARS-CoV-  
28 2 variants for each interaction, predicted impact of natural human population variation on binding affinity,  
29 and a further prioritized set of drug repurposing candidates predicted to overlap with protein interfaces<sup>†</sup>.  
30 All predictions are available online<sup>†</sup> for easy access and are continually updated when new interactions  
31 are published.

32

33 † Some sections of this pre-print have been redacted to comply with current bioRxiv policy restricting  
34 the dissemination of purely in silico results predicting potential therapies for SARS-CoV-2 that have not  
35 undergone thorough peer-review. The results section titled “Prioritization of Candidate Inhibitors of  
36 SARS-CoV-2-Human Interactions Through Binding Site Comparison,” Figure 4, Supplemental Table 9,  
37 and all links to our web resource have been removed. Blank headers left in place to preserve structure  
38 and item numbering. Our full manuscript will be published in an appropriate journal following peer-  
39 review.

40 **Main Text**

41 **Introduction**

42 The ongoing global COVID-19 pandemic caused by the infection of SARS-CoV-2 has to date infected  
43 more than 30 million people and caused more than 940,000 deaths worldwide<sup>1</sup>. Coronaviruses are a  
44 family of enveloped viruses that cause respiratory and/or enteric tract infections in a wide range of avian  
45 and mammalian hosts<sup>2</sup>. To date, seven well characterized coronaviruses infect humans<sup>3-5</sup> with severity  
46 ranging from a mild respiratory illness to severe pneumonia and acute respiratory distress syndrome  
47 (ARDS). Among these, SARS-CoV-2 is unique in its characteristics being both highly transmissible and  
48 capable of causing severe disease in a subset of individuals; whereas other human coronaviruses are either  
49 highly transmissible yet generally not highly pathogenic (e.g. HCoV-229E, HCoV-OC43) or highly  
50 pathogenic but poorly transmissible (SARS-CoV and MERS-CoV). SARS-CoV-2 is also unique in its range  
51 of infection and pathogenesis<sup>6, 7</sup>. While the vast majority of infected individuals (~25-35%) experience only  
52 mild or minimal symptoms, ~1-2% of infected patients die primarily from severe respiratory failure and acute  
53 respiratory distress syndrome<sup>8, 9</sup>. The differences in morbidity, hospitalization, and mortality among different  
54 ethnic groups—particularly Blacks and Hispanics<sup>10-15</sup>—could not be fully explained by cardiometabolic,  
55 socioeconomic, or behavioral factors, suggesting that human genetic variation may significantly impact  
56 SARS-CoV-2 pathogenicity. Therefore, insights into the evolution of SARS-CoV-2, its markedly elevated  
57 transmission rate relative to SARS-CoV, and dynamic range of symptoms are currently of key areas of  
58 interest. These traits are likely driven by differences in the mechanism of pathology and interactions  
59 between the virus and its host cells, but their specific causes are yet to be characterized.

60 One avenue to better understand the mechanisms of either viral- or bacterial- infection and  
61 pathology is through studying the network of protein-protein interactions that occur between a pathogen  
62 and its host. Viral-human interactome maps have previously been compiled for SARS-CoV<sup>16</sup>, HIV<sup>17</sup>,  
63 Ebola virus<sup>18</sup>, and Dengue and Zika viruses<sup>19</sup> among others. Recently, an affinity-purification mass-  
64 spectrometry approach has been applied to 29 SARS-CoV-2 proteins uncovering 332 viral-human  
65 interactions<sup>20</sup>. These inter-species interactions play central roles in disease progression including,  
66 acting as facilitators of pathogen entry into host cells<sup>21-26</sup>, inducing an inhibitory effect on host response  
67 proteins and pathways<sup>27-29</sup>, and hijacking cell signaling or metabolism to accelerate cellular—and

68 consequentially viral—replication<sup>30-32</sup>. Understanding the structure and dynamics of these interactions  
69 can provide critical insights into their effect on the cell. For instance, determination of the structure of  
70 an interaction between poxvirus chemokine inhibitor vCCI and human MIP-1 $\beta$  revealed that the viral-  
71 human binding interface occluded domains vital to chemokine homodimerization, receptor binding, and  
72 interactions with GAG, thus explaining how this interaction elicits an inhibitory effect on chemokine  
73 signaling<sup>29</sup>. Additionally, the dynamics of an interaction between a herpesvirus cyclin and human cdk2  
74 revealed that although the binding interface was distinct from that between human cyclin A and cdk2,  
75 the net conformational impact on cdk2 effectively mimicked that of the native interaction leading to  
76 dysregulated cell cycle progression<sup>31</sup>.

77 Because protein-protein interactions are responsible for mediating the majority of protein  
78 function<sup>33-35</sup>, targeted disruption of these interactions by small molecule inhibitors that compete for the  
79 same binding site can offer a precise toolkit to modulate cellular function<sup>33, 35-38</sup>. For example, BCL-2  
80 inhibitors that displace bound anti-apoptotic BCL-X interactors can treat chronic lymphocytic leukemia  
81 pathogenesis<sup>39, 40</sup>. Targeted disruption of protein interactions can be particularly effective in viral  
82 networks due to their small proteomes with highly optimized function, and potent inhibitors of key  
83 interactions have been developed against viral proteins. Targeted disruption of viral complexes—  
84 particularly those responsible for viral replication—has been successful in vaccinia virus<sup>41</sup> and human  
85 papilloma virus therapies<sup>42, 43</sup>. In particular, disruption of viral-host protein-protein interactions explicitly  
86 involved in early viral infection is an important therapeutic strategy. Discovery that a population variant in  
87 the membrane protein CCR5 conferred resistance to HIV-1 by disrupting its interaction with the viral  
88 envelope glycoprotein led to the development of Maraviroc as an FDA approved treatment for HIV-1  
89 that functions by blocking the interface for this interaction<sup>23, 44</sup>.

90 Here we apply a comprehensive interactome modeling framework to construct a 3D structural  
91 interactome between SARS-CoV-2 and human protein based on the current interactome map published  
92 by Gordon *et al.*<sup>20</sup> Our framework consists of homology modeling to maximize structural coverage of the  
93 SARS-CoV-2 proteome, applying our previous ECLAIR classifier<sup>45</sup> to identify interface residues for the  
94 whole SARS-CoV-2-human interactome, followed by atomic resolution interface modeling through  
95 guided docking in PyRosetta<sup>46</sup>. We additionally carried out in-silico scanning mutagenesis to predict the

96 impact of mutations on interaction binding affinity and performed a comparison of protein-protein and  
97 protein-drug binding sites. We compile all results from our structural interactome into a user-friendly  
98 web server allowing for quick exploration of individual interactions or bulk download and analysis of the  
99 whole dataset. Further, we explore the utility of our interactome modeling approach in identifying key  
100 interactions undergoing evolution along viral protein interfaces, highlighting population variants on  
101 human interfaces that could modulate the strength of viral-host interactions to confer protection from or  
102 susceptibility to COVID-19, and prioritizing drug candidates predicted to bind competitively at viral-  
103 human interaction interfaces.

## 104 **Results**

### 105 Enrichment of divergence between SARS-CoV and SARS-CoV-2 at spike-ACE2 binding interface

106 To highlight the utility of computational and structural approaches to model the SARS-CoV-2-human  
107 interactome, we first examined the interaction between the SARS-CoV-2 spike protein (S) and human  
108 angiotensin-converting enzyme 2 (ACE2) (**Fig 1.a**). This interaction is key for viral entry into human  
109 cells<sup>3</sup> and is the only viral-human interaction with solved crystal structures available in both SARS-CoV<sup>47</sup>  
110 and SARS-CoV-2<sup>48-50</sup>. Comparison between SARS-CoV and SARS-CoV-2 revealed that sequence  
111 divergence of the S protein was highly enriched at the S-ACE2 interaction interface (**Fig 1.a**;  
112  $\text{Log2OddsRatio}=2.82$ ,  $p=1.97e-5$ ), indicating functional evolution around this interaction. To explore the  
113 functional impact of these mutations on this interaction, we leveraged the Rosetta energy function<sup>51</sup> to  
114 estimate the change in binding affinity ( $\Delta\Delta G$ ) between the SARS-CoV and SARS-CoV-2 versions of the  
115 S-ACE2 interaction (**Fig 1.b** and **1.c**). The predicted negative  $\Delta\Delta G$  value of -14.66 Rosetta Energy Units  
116 (REU) indicates an increased binding affinity using the SARS-CoV-2 S protein driven by better optimized  
117 solvation and hydrogen bonding potential fulfillment along the ACE2 interface. Our result is consistent  
118 with the hypothesis that increased stability of the S-ACE2 interaction is one of the key reasons for  
119 elevated transmission of SARS-CoV-2<sup>52</sup>. Moreover, recent experimental energy kinetics assays have  
120 shown that SARS-CoV-2 S protein binds ACE2 with 10-20-fold higher affinity than that of SARS-CoV S  
121 protein<sup>53</sup> supporting the conclusions from our computational modeling.

122 Medical experts have also noted a wide range in severity of and susceptibility to SARS-CoV-2  
123 among individuals<sup>6, 7, 54</sup>. Several hypotheses for genetic predisposition models have been proposed  
124 including that expression quantitative trait loci (eQTLs) may up- or down-regulate host response genes  
125 and that functional coding variants may alter viral-human interactions<sup>55, 56</sup>. For instance, a recent RNA-  
126 sequencing analysis suggested that higher expression of ACE2 in Asian males effectively provides more  
127 routes of entry for the virus and could explain increased susceptibility among this population<sup>57</sup>.  
128 Alternatively, missense population variants in ACE2 could modulate susceptibility to infection by  
129 strengthening or weakening the S-ACE2 interaction. A total of six missense population variants reported  
130 in gnomAD<sup>58</sup> localize to the S-ACE2 interface. Using a mutation scanning pipeline in PyRosetta<sup>59, 60</sup> we  
131 predicted the impact on binding affinity for each variant (**Fig 1.d**). The three population variants  
132 predicted to have the largest impact on S-ACE2 binding affinity— ACE2\_E37K ( $\Delta\Delta G=1.50$ ), ACE2\_M82I  
133 ( $\Delta\Delta G=2.95$ ), and ACE2\_G326E ( $\Delta\Delta G=5.74$ )—were all consistent with previous experimental screens  
134 which identified them as putative protective variants exhibiting decreased binding of ACE2 to S<sup>61, 62</sup>.  
135 Cumulatively, our results highlight the usefulness of a 3D structural interactome modeling approach in  
136 identifying interactions and mutations important for viral infection, pathogenesis, and transmission.

### 137 Constructing the 3D Structural SARS-CoV-2-Human Interactome

138 After successfully applying our modeling approaches to recapitulate the effect of mutations along the S-  
139 ACE2 interface, we expanded our efforts to compile a complete 3D structural interactome between  
140 SARS-CoV-2 and human proteins. An early interactome screen by Gordon *et al.*<sup>20</sup> uncovered 332 viral-  
141 human interactions that provide the foundation for our 3D interactome. To model these interactions, we  
142 first constructed homology models for 18 of 29 SARS-CoV-2 proteins with suitable templates  
143 (**Supplemental Figure 1**). Then, we predicted the interface residues for each interaction using our  
144 **E**nsemble **C**lassifier **L**earning **A**lgorithm to predict **I**nterface **R**esidues (ECLAIR) framework<sup>45</sup>. In total,  
145 our pipeline identified 692 interface residues across 18 SARS-CoV-2 proteins with an average 24.7  
146 residues per interface and 6,763 across 190 human proteins with an average 20.3 residues per  
147 interface. A summary of the classifier utilization, prediction confidences, and interface size is provided  
148 in **Supplemental Figure 2**.

149 In order to add a structural component to our interactome map, and thereby enable modeling of  
150 the binding affinity for these interactions, we additionally performed docking in PyRosetta using our  
151 ECLAIR interface likelihood predictions to refine the search space (**Supplemental Figure 3**). Structural  
152 models were available for both the human and SARS-CoV-2 proteins in 250 out of 332 interactions  
153 (75%) making them amenable to guided docking experiments. After performing up to 50 independent  
154 docking experiments for each interaction and retaining the top-scored conformation we report 959  
155 interface residues across 18 SARS-CoV-2 proteins with an average 18.2 residues per interface and  
156 4,483 across 250 human proteins with an average 17.9 residues per interface (**Supplemental Figure**  
157 **2.g**). For all analyses, interface annotations provided from docking experiments were prioritized over  
158 our ECLAIR predictions. The full interface annotations from our ECLAIR and docking predictions are  
159 available in **Supplemental Table 1** and **Supplemental Table 2** respectively.

#### 160 Perturbation of Human Proteins by Disease Mutations and Binding of SARS-CoV-2 Interactions Occur 161 at Distinct Sites

162 After constructing the 3D interactome between SARS-CoV-2 and human, we first looked for evidence  
163 of interface-specific variation by mapping both gnomAD<sup>58</sup> reported human population variants  
164 (**Supplemental Table 3**) and sequence divergences between SARS-CoV and SARS-CoV-2  
165 (**Supplemental Table 4**) onto the predicted interfaces. In general, conserved residues have been shown  
166 to cluster at protein-protein interfaces<sup>63</sup>, and a recent analysis of SARS-CoV-2 structure and evolution  
167 likewise concluded that highly conserved surface residues were likely to drive protein-protein  
168 interactions<sup>64</sup>. Consistent with these prior findings at an interactome-wide level, we observed significant  
169 depletion for both viral and human variation along the predicted interfaces comparable to that observed  
170 on solved human-human interfaces (**Fig 2.a**).

171 Nonetheless, considering each interaction individually, our analysis uncovered a 13 interaction  
172 interfaces enriched for human population variants (**Fig 2.b**), and 7 enriched for recent viral sequence  
173 divergences (**Fig 2.c**). A breakdown of variant enrichment on each interface is provide in **Supplemental**  
174 **Table 5**. The individual viral interfaces showing an unexpected degree of variation may—like the  
175 previously discussed S-ACE2 interface—be indicative of recent functional evolution around the viral-

176 human interaction. Considering the slower rate of evolution in humans, enrichment of population  
177 variants along the human interfaces is unlikely to be a selective response to the virus. Rather, these  
178 interfaces with high population variation along the interfaces may represent edges in the interactome  
179 whose strength may fluctuate among individuals or between populations. Alternatively, enrichment and  
180 depletion of variation along the human-viral interfaces could help distinguish viral proteins that bind  
181 along existing—and therefore conserved—human-human interfaces from those that bind using novel  
182 interfaces—that would be less likely to be under selective pressure.

183         To further explore the functional impact of naturally occurring variants on the human interactors  
184 of SARS-CoV-2, we considered variants with phenotypic associations as reported in HGMD<sup>65</sup>, ClinVar<sup>66</sup>  
185 or the NHGRI-EBI GWAS Catalog<sup>67</sup>. Interactors of SARS-CoV-2 were significantly more likely than the  
186 rest of the human proteome to harbor phenotypic variants in each of these databases (**Fig 2.d**). Notably,  
187 among the individual disease categories enriched in this gene set, several were consistent with reported  
188 comorbidities including heart disease, respiratory tract disease, and metabolic disease<sup>68, 69</sup> (**Fig 2.e**;  
189 **Supplemental Table 6**). Disruption of native protein-protein interactions is one mechanism of disease  
190 pathology, and disease mutations are known to be enriched along protein interfaces<sup>70, 71</sup>. Human  
191 population variants on the predicted human-viral interface were more likely to be annotated as  
192 deleterious by SIFT<sup>72</sup> and PolyPhen<sup>73</sup> but showed identical allele frequency distributions compared to  
193 those off the interfaces (**Supplemental Figure 4**). However, mapping annotated disease mutations onto  
194 the protein interfaces only revealed significant enrichment along known human-human interfaces; no  
195 such enrichment was found on human-viral interfaces (**Fig 2.f**). This is likely because unlike with human-  
196 human interactions, mutations disrupting human-viral interactions would not disrupt natural cell function,  
197 and therefore would be unlikely to be pathogenic. Our finding that disease mutations and viral proteins  
198 affect human proteins at distinct sites is consistent with a two-hit hypothesis of comorbidities whereby  
199 proteins whose function is already affected by genetic background may be further compromised by viral  
200 infection.



201 Analysis of Binding Affinity Changes Between SARS-CoV and SARS-CoV-2 Helps Identify Key Interactions

202 We next sought to explore the impact of sequence divergence in SARS-CoV-2 relative to SARS-CoV on  
203 viral-human interactions. Mutations between the two viruses were identified by pairwise alignment and the  
204 impacts of these mutations on the binding energy ( $\Delta\Delta G$ ) for 250 interactions amenable to docking were  
205 predicted using a PyRosetta pipeline<sup>46, 59, 60</sup>. Although the binding energy for most interactions was  
206 unchanged—either because no mutations occurred near the interface or because the mutations that did  
207 had marginal effect—we observed an increased likelihood of the divergence from SARS-CoV to SARS-  
208 CoV-2 resulting in decreased binding energy (i.e. more stable interaction) (**Fig 3.a; Supplemental Table**  
209 **7**). The significant outliers in these  $\Delta\Delta G$  predictions can help pinpoint key differences between the viral-  
210 human interactomes of SARS-CoV and SARS-CoV-2. We further note a wide range of affinity impacts  
211 among various human interactors of a single viral protein (**Fig 3.d**) and hypothesize that these differences  
212 may help identify the most important interactions.

213 To further explore the significance of these changes in interaction affinity, we considered those  
214 interactions with the largest decrease in binding energy; corresponding to the largest predicted increase in  
215 affinity. Specifically, we highlight the interaction between coronavirus orf9c and human mitochondrial NADH  
216 Dehydrogenase (Ubiquinone) 1 Alpha Subcomplex, Assembly Factor 1 (NDUFAF1) (**Fig 3.e;  $\Delta\Delta G=-21.7$**   
217 **REU**). Two mutations contribute to the increased stability of this interaction in SARS-CoV-2. During the  
218 transition from the unbound to bound states of orf9c, His-34 rotates inwards to accommodate NDUFAF1  
219 resulting steric tensions with orf9c residue 61. The mutation from the bulkier Val-61 (SARS-CoV) to Ala-61  
220 (SARS-CoV-2) helps alleviate this tension resulting in overall more favorable energy state transition.  
221 Second, the mutation from the polar Glu-60 (SARS-CoV) to the nonpolar Met-60 (SARS-CoV-2) contributes  
222 to overall better solvation energy along the interface involving residue 60 of orf9c and the Ser-148, Glu-  
223 149, Val-150 stretch of NDUFAF1.

224 Although the precise role of coronavirus orf9c (sometimes annotated as orf14) has not yet been  
225 characterized, experiments in SARS-CoV have shown that it localizes to vesicular components<sup>74</sup> and  
226 interactome data from SARS-CoV-2 reveal that it targets host mitochondrial proteins and could impact  
227 proteins responsible for modulating I $\kappa$ B kinase and NF- $\kappa$ B signaling pathways<sup>20</sup>. NDUFAF1 is a chaperone  
228 protein involved in the assembly of the mitochondrial complex I<sup>75, 76</sup>. RNAi screens have associated

229 knockdown of NDUFAF1 with increased vaccinia virus infection<sup>77</sup>. Moreover, properly assembled  
230 mitochondrial complex I—including NDUFAF1—has been shown to be indispensable for reactive oxygen  
231 species based signaling to trigger expression of interleukins 2 and 4 and activate signaling of TLR7<sup>78</sup>, a  
232 SARS-CoV-2 ARDS predisposition gene<sup>79</sup>. Recent reports have suggested that the virus may hijack host  
233 metabolism through complex I to increase replication<sup>80</sup>. Additionally, NDUFAF1 harbors disease mutations  
234 for complex I deficiency and hypertrophic cardiomyopathy that may be linked to SARS-CoV-2 comorbidities.  
235 Our result predicting increased stability of the interaction between orf9c and NDUFAF1 in SARS-CoV-2  
236 relative to SARS-CoV suggests a stronger impact on complex I assembly and potential disruption of  
237 downstream pathways.

238 We further identified several interactions with significantly altered binding energy in SARS-CoV-2  
239 with potential links to cellular response to viral infection. In orf9c we additionally predicted increased affinity  
240 with a Golgi signaling protein, TMED5 ( $\Delta\Delta G=-21$  REU). Phenotypic screens have linked TMED5 to altered  
241 viral infectivity<sup>77, 81, 82</sup> and decreased interleukin 8 secretion<sup>83</sup>. Although no known mechanisms directly link  
242 TMED5 to immune response, one of its interactors, TMED2<sup>84</sup>, is known to potentiate interferon response  
243 to viral infection<sup>85</sup>. Interaction with TMED5 may additionally be linked to viral transport within and secretion  
244 from its host<sup>86</sup>. Finally, the mitochondrial protein TOMM70 was predicted to bind orf9b with greater affinity  
245 ( $\Delta\Delta G=-11$  REU) in SARS-CoV-2. TOMM70 has been linked to mitochondrial antiviral signaling through  
246 downstream activation of interferon regulatory factors<sup>87</sup>.

#### 247 Predicting the Impact of Human Populations Variants on SARS-CoV-2-Human Protein Interactions

248 A dynamic range of patient responses and symptoms have been reported for SARS-CoV-2 infection. In  
249 previously studied viruses including HIV, underlying genetic variation can explain up to 15% of variation in  
250 patient response and overall viral load<sup>88</sup>. Moreover, previous high-throughput experiments suggest that, up  
251 to 10.5% of missense population variants can disrupt native protein-protein interactions<sup>89</sup>. Therefore, we  
252 hypothesize that some fraction of patient response to SARS-CoV-2 can be explained by missense  
253 variations and their impact on viral-human interactions. To explore this hypothesis, we performed in-silico  
254 scanning mutagenesis along all docked interfaces in PyRosetta. We identified as binding energy hotspot  
255 mutations all mutations with a predicted  $\Delta\Delta G$  at least one standard deviation away from the mean for

256 identical amino acid substitutions across the rest of the interface. In total, out of 2,241 population variants  
257 on eligible interfaces, 161 (7.2%) were identified as hotspots predicted to disrupt interaction stability, and  
258 116 (5.2%) were identified as hotspots predicted to contribute to interaction stability (**Fig 3.b**). Most of the  
259 hotspot mutations were predicted to be driven by solvation or repulsive forces, with disruptive hotspots  
260 primarily being driven by repulsive forces and stabilizing hotspots primarily being driven by solvation forces  
261 (**Fig 3.c**). Results summarizing the predicted impact of all 2,241 population variants on the docked  
262 interfaces are provided in **Supplemental Table 8**.

### 263 Prioritization of Candidate Inhibitors of SARS-CoV-2-Human Interactions Through Binding Site Comparison

#### 264 A Web Server to Present the SARS-CoV-2-Human 3D Structural Interactome

265 In order to present the results from our experiments as a comprehensive easy-access resource to the  
266 general public, we constructed the SARS-CoV-2 human structural interactome web. All structures used  
267 for modeling, interface predictions, raw docking outputs, mutation binding impacts, and analyses  
268 described herein are directly available for download through our downloads page. Our homepage allows  
269 users quick navigation through the reported interactome to view results summarizing specific  
270 interactions of interest. Aside from providing a 3D view of the interaction and predicted interface  
271 residues, our results page provides four main functionalities (**Fig 5**).

272 The interface comparison panel (**Fig 5 top left**) provides a linear representation of protein  
273 sequence with interface annotations. Linear representations of all other known or predicted interfaces  
274 from the same protein are shown for comparison along with navigation links to explore other interaction  
275 partners either within the site (for viral-human interactions) or through InteractomeINSIDER<sup>45</sup> (for  
276 human-human interactions). In particular, from the human perspective, this comparison may reveal  
277 biologically meaningful insights about the interface overlap and possible competition between viral and  
278 human interactors.

279 The mutations panel (**Fig 5 top right**) provides information on variation in each interaction  
280 partner. For the viral side, mutations are reported based on divergence from the SARS-CoV version of  
281 the protein. For the human side, all known population variants as reported in gnomAD are listed<sup>58</sup>.

282 Additionally, we provide a log odds ratio describing the enrichment or depletion of variation along the  
283 interface. These results may help highlight interactions undergoing functional evolution along the viral  
284 interface.

285 For each interaction amenable to docking, the  $\Delta\Delta G$  Information panel (**Fig 5 lower left**)  
286 compiles the results from our in-silico scanning mutagenesis to report binding affinity predictions for all  
287 possible mutations across the docked interface. Individual mutations are colored by their z-score  
288 normalized  $\Delta\Delta G$  prediction. The results can be toggled to only show the impacts of known variants. On  
289 the viral side, a cumulative  $\Delta\Delta G$  value is provided describing the predicted change in binding affinity  
290 between the SARS-CoV and SARS-CoV-2 versions of the protein.

291 The current version of the SARS-CoV-2 human structural interactome web server describes 332  
292 viral-human interactions reported by Gordon *et al.*<sup>20</sup>. We will continue support for the web server with  
293 periodic updates as additional interactome screens between SARS-CoV-2 and human are published.  
294 As we update, a navigation option to select between the current or previous stable releases of the web  
295 server will be provided.

## 296 **Discussion**

297 Overall, we present a comprehensive resource to explore the SARS-CoV-2-human protein-protein  
298 interactome map in a structural context. Analysis through this framework allows us to consider the recent  
299 evolution of SARS-CoV-2 in the context of its interactome map and to prioritize for further functional  
300 characterization key interactions. Likewise, our consideration of underlying variation in the human  
301 proteins that interact with SARS-CoV-2 may be valuable in explaining differences in response to  
302 infection. We particularly note that our observation that perturbation from underlying disease mutations  
303 and viral protein binding occur at distinct sites on the protein is of clinical interest. Further investigation  
304 into the combined role of these two sources of perturbation to better understand the mechanisms linked  
305 to comorbidities is warranted.

306 However, our work is not without limitation. Firstly, we note that although structural coverage  
307 from our homology modelling of SARS-CoV-2 proteins was robust (**Supplemental Figure 1**), the same  
308 could not be universally said of the human proteins. Although guided molecular docking was always

309 done to orient the most likely interface residues on each structure towards each other, protein-protein  
310 docking using incomplete protein models introduces some bias and low coverage may exclude some  
311 true interface residues. For this reason, the initial ECLAIR interface annotations—which are less subject  
312 to structural coverage limitations—may provide orthogonal value. We additionally note that direct  
313 quantitative interpretation of predicted  $\Delta\Delta G$  values using the Rosetta scoring function is often difficult  
314 since different term weights can be used in different setups. Although the same scoring function was  
315 used for all predictions described here, the relative magnitude of each term may change based on the  
316 size and composition of different proteins between interactions. For these reasons, we only employ a  
317 relative qualitative comparison of similar predictions when interpreting our scanning mutagenesis  
318 results. Moreover, the structure optimization after each mutation is applied focuses on side-chain  
319 repacking, therefore, our results focus only on mutations at or near the interface where the impact of  
320 side-chain repacking could be measured. We expect there may be some mutations with significant  
321 impact on binding affinity that act through refolding or other allosteric effects that are missed by our  
322 method.

323 Perhaps most importantly, we emphasize the importance of further experimental  
324 characterization to confirm the predictions made here. Nonetheless we believe our 3D Structural SARS-  
325 CoV-2-human Interactome web server will prove to be a key resource in informing hypothesis driven  
326 exploration of the mechanisms of SARS-CoV-2 pathology and host response. The scope, and potential  
327 impacts of our webserver will continue to grow as we incorporate the results of ongoing and future  
328 interactome screens between SARS-CoV-2 and human. Additionally, we note that our 3D structural  
329 interactome framework can be rapidly deployed to analyze future viruses.

## 330 **Online Methods**

### 331 Generation of Homology Models for SARS-CoV-2 Proteome

332 Homology-based modeling of all 29 SARS-CoV-2 proteins was performed in Modeller<sup>90</sup> using a multiple  
333 template modeling procedure. In brief, a list of candidate template structures for each protein to be  
334 modelled was obtained by running BLAST<sup>91</sup> against a reference containing all sequences in the Protein  
335 Data Bank (PDB)<sup>92</sup>. Templates were filtered to only retain those with at least 30% identity to the protein  
336 to be modelled, and the remaining templates were ranked using a weighted combination of percent  
337 identity and coverage as described previously<sup>93</sup>. To compile the final set of overlapping templates for  
338 modeling, first the top ranked template was selected as a seed. Overlapping templates were iteratively  
339 added to the set so long as 1) the new template increased the overall coverage by at least 10%, and 2)  
340 the new template retained a total percent identity no more than 25% worse than the initial seed template.  
341 Pairwise alignments between the protein to be modelled and the template set were generated using a  
342 Modeller alignment object with default settings. Alignments were manually trimmed to remove any  
343 regions with large gaps (at least 5 gaps in the alignment in a 10 residue window). Finally, alignment was  
344 carried out using the Modeller automodel function.

345 This approach generated suitable homology models for 18 out of 29 proteins. A visual  
346 representation of each structure and templates used is provided in **Supplemental Figure 1**.

### 347 Phase One Interface Prediction Using ECLAIR

348 Interface predictions for all 332 interactions reported by Gordon *et al.*<sup>20</sup> were made in two phases. In  
349 phase one, we leveraged our previously validated **E**nsemble **C**lassifier **L**earning **A**lgorithm to  
350 predict **I**nterface **R**esidues (ECLAIR)<sup>45</sup> to perform an initial prediction of likely interface residues across  
351 all interactions. ECLAIR compiles five sets of features; biophysical, conservation, coevolution,  
352 structural, and docking. In brief, biophysical features are compiled using a windowed average of several  
353 ExPASy ProtScales<sup>94</sup>, conservation features are derived from the Jensen-Shannon divergence<sup>95, 96</sup>  
354 across all available homologs for each protein, coevolution features between interacting proteins are  
355 derived from direct coupling analysis (DCA)<sup>97</sup> and statistical coupling analysis (SCA)<sup>98</sup> among paired  
356 homologs, structural features are obtained by calculating the solvent accessible surface area of

357 available PDB<sup>92</sup> or ModBase<sup>99</sup> models using NACCESS<sup>100</sup>, and docking features are derived from an  
358 average of docking predictions made using Zdock<sup>101</sup>.

359 To accommodate predictions between SARS-CoV-2 and human, slight alterations were made.  
360 First calculation of coevolution features was impossible because the calculation of SCA and DCA  
361 requires analysis of multiple sequence alignments from paired homologs of both interacting proteins  
362 across at least 50 species. Because we here consider inter-species interaction, no one species could  
363 contain homologs of both the viral and human proteins. Second, the calculation of conservation features  
364 for the viral proteins were modified to account for conservation between both related viral species and  
365 various strains that have been sequenced in a single species. We typically only include one homolog  
366 per species in these calculations, but expanded our criteria here because availability of the protein  
367 conservation feature is a requirement for all of our higher-confidence classifiers. Finally, the calculation  
368 of structural features for the viral protein were overruled to use the manually provided homology models  
369 instead of pulling structures from the PDB or ModBase. A visual summary of the ECLAIR interface  
370 predictions is presented in **Supplemental Figure 2** and the initial prediction results are provided in  
371 **Supplemental Table 1**.

### 372 Phase Two Interface Prediction Using Guided PyRosetta Docking

373 Interface predictions for all 332 interactions reported by Gordon *et al.*<sup>20</sup> were made in two phases. In  
374 phase two, we generated atomic resolution models of 250 interactions by leveraging the Rosetta scoring  
375 function<sup>51</sup> and prior probabilities obtained from ECLAIR predictions to perform guided docking. The  
376 remaining 82 interactions were missing reliable 3D models for at least one of their members and  
377 therefore were not amenable to docking. A schematic summary of our docking methodology is presented  
378 in **Supplemental Figure 3**.

379 Using the predicted interface probabilities reported by ECLAIR, we set up the initial docking  
380 conformation to explore a restricted search space for each docking simulation. In cases where multiple  
381 structures were available for the human protein, all structures were weighted based on the ECLAIR  
382 scores for the covered residues in each structure to maximize both coverage and inclusion of likely  
383 interface residues. For each protein in the interaction, we performed a linear regression classification in

384 scikit-learn<sup>102</sup> to optimally separate the likely interface residues from likely non-interface residues. The  
385 plane defined by this linear regression served as a reference to orient the structures along the y-axis  
386 with their most probable interface sides facing each other. The two chains were centered at (0, 0) along  
387 the x-z plane and separated a distance of 5 Å along the y-axis. For each docking attempt, a series of  
388 random perturbations from these initial conformations were made to search the nearby space. First, the  
389 human protein was rotated up to 360° along the y-axis to allow full exploration of different rotations of  
390 the two interfaces relative to each other. Second, to apply some flexibility to the plane predicting the  
391 interface vs. non-interface sides of each protein, up to 30° of rotation along the x- and z- axis were  
392 allowed for both the viral and human proteins. Finally, a random translation up to 5 Å in magnitude was  
393 applied to the human protein along the x-z plane so that the docking could explore contact points other  
394 than the center of masses along these axes.

395 After initializing these guided starting conformations, docking was simulated in PyRosetta<sup>46</sup>  
396 using a modified version of the protein-protein docking methodology provided by Gray 2006<sup>103</sup>. The  
397 initial demo ([https://graylab.jhu.edu/pyrosetta/downloads/scripts/demo/D100\\_Docking.py](https://graylab.jhu.edu/pyrosetta/downloads/scripts/demo/D100_Docking.py)) takes two  
398 chains from a co-crystal structure, applies a random perturbation, and re-docks them. Because  
399 randomized initial orientation was already handled as described previously, these steps were removed  
400 from our docking runs. In brief, the protein models were converted to centroid representation, slid into  
401 contact using the “interchain\_cen” scoring function, and converted back to full atom representation,  
402 before having their side-chains optimized using the predefined “docking” and “docking\_min” scoring  
403 functions. Up to 50 iterations of this guided docking were performed for each interaction, and the docked  
404 conformation resulting in the lowest Rosetta energy score was retained. The final docked interface  
405 annotations are provided in **Supplemental Table 2**.

#### 406 Definition of Interface Residues

407 To annotate interface residues from atomic resolution docked models, we used a previously described  
408 and established definition for interface residues<sup>45</sup>. In brief, the solvent accessible surface area (SASA)  
409 for both bound and unbound docked structures was calculated using NACCESS.<sup>100</sup> We define as  
410 interface residue, any residue that is both 1) at the surface of a protein (defined as  $\geq 15\%$  relative



411 accessibility) and 2) in contact with the interacting chain (defined as any residue whose absolute  
412 accessibility decreased by  $\geq 1.0 \text{ \AA}^2$ ).

#### 413 Compilation of Viral SARS-CoV to SARS-CoV-2 Mutations and Human Population Variants

414 For analysis of genetic variation that may impact the viral-human interactome, two sets of mutations  
415 were compiled; 1) viral mutations between SARS-CoV and SARS-CoV-2, and 2) human population  
416 variants on proteins shown to interact with viral proteins.

417 For viral mutations, variations between SARS-CoV and SARS-CoV-2 versions of each proteins  
418 were collected. The representative sequences used for the 16 proteins in the SARS-CoV proteome were  
419 taken from the Proteomes section of UniProt (ID UP000000354)<sup>104, 105</sup>. Sequences for 29 SARS-CoV-2  
420 proteins were obtained from the annotations by Gordon *et al.*<sup>20</sup> based on genbank accession  
421 MN985325<sup>106, 107</sup>. Notably, UniProt accessions for the SARS-CoV proteome report two sequences for  
422 the uncleaved ORF1a and ORF1a-b which correspond to NSP1 through NSP16 in SARS-CoV-2.  
423 Variations between SARS-CoV and SARS-CoV-2 were reported after pairwise Needleman Wench  
424 alignment<sup>108, 109</sup> (using Blosum62 scoring matrix, gap open penalty of 10 and gap extension penalty of  
425 0.5) between the corresponding protein sequences in each species. A total of 1,003 missense variants  
426 were detected among 23 SARS-CoV-2 proteins. No variations were reported for orf3b, orf8, or orf10  
427 because no suitable alignment could be made with a SARS-CoV sequence. Additionally, orf7b, nsp3,  
428 and nsp16 were excluded from this set because they were not involved in any viral-human interactions.  
429 The full list of SARS-CoV-2 mutations is reported in **Supplemental Table 4**.

430 Human population variants in all 332 human proteins shown to interact with SARS-CoV-2  
431 proteins were obtained from gnomAD<sup>58</sup>. Programmatic queries to fetch all variants for a given gene were  
432 performed using gnomAD's GraphQL API. For details on performing gnomAD queries in this manner see  
433 the `gnomad-api` `github` page ([https://github.com/broadinstitute/gnomad-](https://github.com/broadinstitute/gnomad-browser/tree/master/projects/gnomad-api)  
434 [browser/tree/master/projects/gnomad-api](https://github.com/broadinstitute/gnomad-browser/tree/master/projects/gnomad-api)). Population variants were filtered to only retain missense  
435 variants. In order to map these gnomAD DNA-level SNPs to equivalent protein-level UniProt  
436 annotations, we used the Ensembl Variant Effect Predictor (VEP)<sup>110</sup>. After all mapping was completed,  
437 all variants were parsed to make sure that the reported reference amino acid and position matched up

438 with the UniProt sequence. Roughly 95.6% of cases matched and the remaining variants that could not  
439 reliably be mapped to UniProt coordinates were dropped from our dataset. In total 127,528 human  
440 population variants were curated. The full list of human population variants from GnomAD is reported in  
441 **Supplemental Table 3.**

#### 442 Log Odds Enrichment Calculations

443 In order to determine if viral mutations or human populations variants were enriched at predicted  
444 interaction interfaces, odds ratios were calculated as described previously<sup>111</sup>. All odds ratios were log<sub>2</sub>  
445 transformed to maintain symmetry between enriched and depleted values. For this particular use case,  
446 the equation for the odds ratio was...

$$447 \quad OR = \log_2 \frac{VariantInterfaceResidues / VariantNonInterfaceResidues}{NonVariantInterfaceResidues / NonVariantNonInterfaceResidues}$$

448 where “Variant” vs. “NonVariant” distinguishes positions in a protein sequence that respectively did and  
449 did not overlap with the set of variants, and “InterfaceResidues” vs. “NonInterfaceResidues”  
450 distinguishes positions in a protein sequence that respectively did and did not overlap with the predicted  
451 interface for a given interaction. To avoid arbitrary odds ratio inflation or depletion from missing data, in  
452 all cases where the interface residues were predicted by molecular docking, the odds ratio was altered  
453 to only account for positions that were included in the structural models used for docking. Enrichment  
454 calculations for disease mutations and overlap between drug and protein binding sites were calculated  
455 in the same manner with appropriately adjusted case and exposure categories.

#### 456 Curation of Disease Associated Variants

457 To explore whether human proteins interacting with SARS-CoV-2 proteins were enriched for disease or  
458 trait associated variants, three datasets were curated; the Human Gene Mutation Database (HGMD)<sup>65</sup>,  
459 ClinVar<sup>66</sup>, and the NHGRI-EBI GWAS Catalog<sup>67</sup>. Disease annotations from HGMD and ClinVar were  
460 obtained directly from their respective downloads pages and mapped to UniProt. For overall enrichment  
461 of individual disease terms among all human proteins interacting with SARS-CoV-2, disease terms were  
462 linked in an ontology based on the NCBI MedGen term relationships  
463 (<https://ftp.ncbi.nlm.nih.gov/pub/medgen/MGREL.RRF.gz>). When calculating enrichment, counts for

464 each term were propagated through all parent nodes up to a singular root node. Significant terms were  
465 reported as the most general term with no more significant ancestor term (**Supplemental Table 6**, sheet  
466 1). Raw enrichment values for all terms are also predicted (**Supplemental Table 6**, sheet 2).

467 For curation of disease and trait associations from NHGRI-EBI GWAS Catalog  
468 (<http://www.ebi.ac.uk/gwas/>)<sup>67</sup>, lead SNPs (p-value<5e-8) for all diseases/traits were retrieved on June  
469 16, 2020. Proxy SNPs in high linkage disequilibrium (LD) (Parameters:  $R^2 > 0.8$ ; pop: "ALL") for  
470 individual lead SNPs were obtained through programmatic queries to the LDproxy API<sup>112</sup>, which used  
471 phase 3 haplotype data from the 1000 Genomes Project as reference for calculating pairwise metrics  
472 of LD. Both lead SNPs and proxy SNPs were filtered to only retain missense variants.

473 Gene-level enrich calculations for disease / trait associated mutations in known interactors for  
474 SARS-CoV-2 and variant-level enrichment at the predicted interaction interfaces (either human-human  
475 interactions or human-viral interactions) were performed as described above.

#### 476 Estimation of $\Delta\Delta G$ from variation at the interfaces

477 In order to predict the impact of variation at viral-human interaction interfaces on binding affinity, two  
478 sets of  $\Delta\Delta G$  predictions were made using PyRosetta<sup>46</sup>. First, to explore the overall binding energy  
479 contributions of each interface residue, and to predict the impact of all possible mutations along the  
480 interface, a scanning mutation  $\Delta\Delta G$  approach was implemented based on protocols described  
481 previously<sup>59, 60</sup>. The implementation is essentially identical to a demo provided by the PyRosetta  
482 documentation ([https://graylab.jhu.edu/pyrosetta/downloads/scripts/demo/D090\\_Ala\\_scan.py](https://graylab.jhu.edu/pyrosetta/downloads/scripts/demo/D090_Ala_scan.py)) with one  
483 major exception: interface residues in the original demo are defined using an 8.0 Å inter-chain distance  
484 cutoff, which we overrule with our definition described above. In brief, we iterate over all interface  
485 residues for a given docked structure. For each position, the binding for the interaction from the wildtype  
486 structure is first estimated. The energy for the complex state is estimated following a  
487 PackRotamersMover optimization constrained to only adjust the side-chains of residues within 8.0 Å of  
488 the residue to be mutated. To estimate energy from the unbound state, the chains are first separated  
489 500.0 Å to eliminate any interchain energy contributions, the structures are then optimized and scored

490 identically to the complex state. The difference between these two values provides the binding energy  
491 for the wildtype structure.

$$492 \quad \Delta G_{WT} = E_{complex} - E_{unbound}$$

493 To estimate the binding energy for all 19 amino acid mutations possible at the given position, each  
494 mutation is made iteratively, and the  $\Delta G_{Mut}$  is estimated identically to the wildtype except using the  
495 mutated structures. Finally, the overall impact on binding energy for each mutation is calculated as the  
496 difference between these two binding energies.

$$497 \quad \Delta \Delta G = \Delta G_{Mut} - \Delta G_{WT}$$

498 The scoring function used for these calculations is as described previously<sup>59</sup> using the following weights;  
499  $fa_{atr}=0.44$ ,  $fa_{rep}=0.07$ ,  $fa_{sol}=1.0$ ,  $hbond_{bb\_sc}=0.5$ ,  $hbond_{sc}=1.0$ . To account for the  
500 stochasticity of the PackRotamersMover optimization between trials, all  $\Delta \Delta G$  values are reported from  
501 an average of 10 independent trials which yielded overall low standard deviation between trials. To  
502 check whether an individual mutation's average  $\Delta \Delta G$  was significantly non-zero, a two-sided z-test  
503 between the 10 independent trials was performed. To account for average impact other same amino  
504 acid mutations at other positions along the interface, each average  $\Delta \Delta G$  was z-normalized relative to  
505 the rest of the interface and outliers were called at  $\geq 1$  standard deviation away from the mean. Mutations  
506 that passed both criteria were identified as significant interface binding affinity hotspots.

507 Second, estimates of the overall impact of the cumulative set of mutations between SARS-CoV  
508 and SARS-CoV-2 were made using the same general framework. For each interaction, the binding  
509 energy for the SARS-CoV-2 version of the interaction was estimated identically to the wildtype binding  
510 energy. The binding energy for the SARS-CoV version of the interaction was estimated after applying  
511 all mutations between the two viruses (for simplicity, only amino acid substitutions were applied, a  
512 minority of mutations that comprised insertions or deletions could not be modelled). The only difference  
513 compared to the single mutation  $\Delta \Delta G$  calculation was that multiple mutations were applied at once, and  
514 consequentially, the interface packing was done allowing side-chain rotamer optimization for all residues  
515 within 8.0 Å of any of the mutated residues. The  $\Delta \Delta G$  values were calculated such that an interaction  
516 predicted to be more stable (lower binding energy) in the SARS-CoV-2 version of the interaction  
517 compared to the SARS-CoV version of the interaction would have a negative  $\Delta \Delta G$ .

518 
$$\Delta\Delta G = \Delta G_{SARSCoV2} - \Delta G_{SARSCoV1}$$

519 To account to stochasticity between trials for these predictions (which notably had a much larger impact  
520 likely due to the decreased constraints on rotamer optimization in these cases), this set of  $\Delta\Delta G$  values  
521 was reported as an average of 50 trials. Significant outliers for overall binding affinity change from  
522 SARS-CoV to SARS-CoV-2 were called based on similar criteria to the individual mutations, except the  
523 z-score normalization was performed relative to all other interactions.

#### 524 Protein-ligand Docking Using Smina

525 The previous viral-human interactome screen by Gordon *et al.*<sup>20</sup> reported 76 candidate drugs targeting  
526 the 332 human proteins. In order to further prioritize this list and search for drugs that share a binding  
527 site with the viral interactor, we performed protein-ligand docking. Among this list, 71 interaction-drug  
528 pairs involving 49 unique drugs that were amenable to docking were identified. To prep for docking, 3D  
529 structures for all ligands were first generated using Open Babel<sup>113</sup> and the command:

530 `obabel -:"[SMILES_STRING]" --gen3d -opdb -O [OUT_FILE] -d`

531 Protein-ligand docking was executed using smina<sup>114</sup> with the following parameters. The `autobox_ligand`  
532 option was turned on and centered around the receptor PDB file with an `autobox_add` border size of 10  
533 Å. The exhaustiveness was set to 40 to increase the number of independent stochastic sampling  
534 trajectories and increase the likelihood of identifying a global minimum. The `num_modes` was set to  
535 1000 to so that a multitude of lower ranked models could be compared for internal purposes. To reduce  
536 real wall time each docking process was run using 5 CPU cores, although it should be noted runtime is  
537 affected in a strictly linear manner and CPU cores has no impact on net CPU time. Finally, each protein-  
538 ligand docking command was repeated 45 times with a unique seed on each interaction. The final smina  
539 command used was as follows:

540 `smina -r [RECEPTOR] -l [LIGAND] --autobox_ligand [RECEPTOR] --autobox_add 10`  
541 `-o [OUT_FILE] --exhaustiveness 40 --num_modes 1000 --cpu 5 --seed [SEED]`

542 Multiple trials for the same docking problem were performed in order to saturate the ligand binding  
543 search space as thoroughly as possible. Practically speaking this batched docking approach was only  
544 taken so that time spent docking would cycle through each protein-drug pair equally, thus producing

545 results from each pair at an even rate. The net effect is merely as if one docking process had been run  
546 for each protein-drug pair with exhaustiveness parameter set to ~2,000. It should be noted that this level  
547 of sampling was overkill relative to common practices and usually a single run with exhaustiveness  
548 ranging from 30-50 would be sufficient<sup>114</sup>. Docked conformation from all iterations on each protein-drug  
549 pair were compiled into a final set of up to 10 of the best scoring poses. To retain poses that cover  
550 different low-energy binding sites, these poses were selected such that the center of mass of each  
551 docked pose added must be at least 1 Å away from the center of mass of any of the higher ranked  
552 poses. All results described in this manuscript are reported based on only the top ranked pose for each  
553 protein-drug pair. Protein residues involved in the drug binding site were annotated using the same  
554 criteria used to define interface residues. Of note, to include ligand molecules as part of the NACCESS  
555 solvent accessible surface area calculations, the Record Type for all ligand atoms must be manually  
556 changed from HETATM to ATOM.

## References

1. *COVID-19 Dashboard by the Center for Systems Science and Engineering at Johns Hopkins University*. 2020 [cited 2020 August 26, 2020]; Available from: <https://coronavirus.jhu.edu/map.html>.
2. Fehr, A.R. and S. Perlman, *Coronaviruses: an overview of their replication and pathogenesis*. *Methods Mol Biol*, 2015. **1282**: p. 1-23.
3. Zhou, P., et al., *A pneumonia outbreak associated with a new coronavirus of probable bat origin*. *Nature*, 2020. **579**(7798): p. 270-273.
4. McIntosh, K. and S. Perlman, *Coronaviruses, Including Severe Acute Respiratory Syndrome (SARS) and Middle East Respiratory Syndrome (MERS)*. *Mandell, Douglas, and Bennett's Principles and Practice of Infectious Diseases*, 2015: p. 1928-1936.e2.
5. Zhou, H., et al., *A Novel Bat Coronavirus Closely Related to SARS-CoV-2 Contains Natural Insertions at the S1/S2 Cleavage Site of the Spike Protein*. *Curr Biol*, 2020. **30**(11): p. 2196-2203 e3.
6. Gupta, A., et al., *Extrapulmonary manifestations of COVID-19*. *Nat Med*, 2020. **26**(7): p. 1017-1032.
7. Wang, D., et al., *Clinical Characteristics of 138 Hospitalized Patients With 2019 Novel Coronavirus-Infected Pneumonia in Wuhan, China*. *JAMA*, 2020.
8. Yang, X., et al., *Clinical course and outcomes of critically ill patients with SARS-CoV-2 pneumonia in Wuhan, China: a single-centered, retrospective, observational study*. *Lancet Respir Med*, 2020. **8**(5): p. 475-481.
9. Zhou, F., et al., *Clinical course and risk factors for mortality of adult inpatients with COVID-19 in Wuhan, China: a retrospective cohort study*. *Lancet*, 2020. **395**(10229): p. 1054-1062.



10. Palaiodimos, L., et al., *Severe obesity, increasing age and male sex are independently associated with worse in-hospital outcomes, and higher in-hospital mortality, in a cohort of patients with COVID-19 in the Bronx, New York*. *Metabolism*, 2020. **108**: p. 154262.
11. Ferdinand, K.C. and S.A. Nasser, *African-American COVID-19 Mortality: A Sentinel Event*. *J Am Coll Cardiol*, 2020. **75**(21): p. 2746-2748.
12. Killerby, M.E., et al., *Characteristics Associated with Hospitalization Among Patients with COVID-19 - Metropolitan Atlanta, Georgia, March-April 2020*. *MMWR Morb Mortal Wkly Rep*, 2020. **69**(25): p. 790-794.
13. Raisi-Estabragh, Z., et al., *Greater risk of severe COVID-19 in Black, Asian and Minority Ethnic populations is not explained by cardiometabolic, socioeconomic or behavioural factors, or by 25(OH)-vitamin D status: study of 1326 cases from the UK Biobank*. *J Public Health (Oxf)*, 2020.
14. Moore, J.T., et al., *Disparities in Incidence of COVID-19 Among Underrepresented Racial/Ethnic Groups in Counties Identified as Hotspots During June 5-18, 2020 - 22 States, February-June 2020*. *MMWR Morb Mortal Wkly Rep*, 2020. **69**(33): p. 1122-1126.
15. Mahajan, U.V. and M. Larkins-Pettigrew, *Racial demographics and COVID-19 confirmed cases and deaths: a correlational analysis of 2886 US counties*. *J Public Health (Oxf)*, 2020. **42**(3): p. 445-447.
16. Pfefferle, S., et al., *The SARS-coronavirus-host interactome: identification of cyclophilins as target for pan-coronavirus inhibitors*. *PLoS Pathog*, 2011. **7**(10): p. e1002331.
17. Jager, S., et al., *Global landscape of HIV-human protein complexes*. *Nature*, 2011. **481**(7381): p. 365-70.
18. Batra, J., et al., *Protein Interaction Mapping Identifies RBBP6 as a Negative Regulator of Ebola Virus Replication*. *Cell*, 2018. **175**(7): p. 1917-1930 e13.
19. Shah, P.S., et al., *Comparative Flavivirus-Host Protein Interaction Mapping Reveals Mechanisms of Dengue and Zika Virus Pathogenesis*. *Cell*, 2018. **175**(7): p. 1931-1945 e18.
20. Gordon, D.E., et al., *A SARS-CoV-2 protein interaction map reveals targets for drug repurposing*. *Nature*, 2020. **583**(7816): p. 459-468.
21. Niemann, H.H., et al., *Structure of the human receptor tyrosine kinase met in complex with the Listeria invasion protein InlB*. *Cell*, 2007. **130**(2): p. 235-46.
22. Hoffmann, M., et al., *SARS-CoV-2 Cell Entry Depends on ACE2 and TMPRSS2 and Is Blocked by a Clinically Proven Protease Inhibitor*. *Cell*, 2020. **181**(2): p. 271-280 e8.
23. Xu, G.G., J. Guo, and Y. Wu, *Chemokine receptor CCR5 antagonist maraviroc: medicinal chemistry and clinical applications*. *Curr Top Med Chem*, 2014. **14**(13): p. 1504-14.
24. Hayouka, Z., et al., *Inhibiting HIV-1 integrase by shifting its oligomerization equilibrium*. *Proc Natl Acad Sci U S A*, 2007. **104**(20): p. 8316-21.
25. Peat, T.S., et al., *Small molecule inhibitors of the LEDGF site of human immunodeficiency virus integrase identified by fragment screening and structure based design*. *PLoS One*, 2012. **7**(7): p. e40147.
26. Maginnis, M.S., *Virus-Receptor Interactions: The Key to Cellular Invasion*. *J Mol Biol*, 2018. **430**(17): p. 2590-2611.

27. Daczkowski, C.M., et al., *Structural Insights into the Interaction of Coronavirus Papain-Like Proteases and Interferon-Stimulated Gene Product 15 from Different Species*. J Mol Biol, 2017. **429**(11): p. 1661-1683.
28. Yao, J., et al., *Mechanism of inhibition of retromer transport by the bacterial effector RidL*. Proc Natl Acad Sci U S A, 2018. **115**(7): p. E1446-E1454.
29. Zhang, L., et al., *Solution structure of the complex between poxvirus-encoded CC chemokine inhibitor vCCI and human MIP-1beta*. Proc Natl Acad Sci U S A, 2006. **103**(38): p. 13985-90.
30. Jonker, H.R., et al., *Structural properties of the promiscuous VP16 activation domain*. Biochemistry, 2005. **44**(3): p. 827-39.
31. Card, G.L., et al., *Crystal structure of a gamma-herpesvirus cyclin-cdk complex*. EMBO J, 2000. **19**(12): p. 2877-88.
32. Smith, M., R. Honce, and S. Schultz-Cherry, *Metabolic Syndrome and Viral Pathogenesis: Lessons from Influenza and Coronaviruses*. J Virol, 2020.
33. Vidal, M., *A unifying view of 21st century systems biology*. FEBS Lett, 2009. **583**(24): p. 3891-4.
34. Robinson, C.V., A. Sali, and W. Baumeister, *The molecular sociology of the cell*. Nature, 2007. **450**(7172): p. 973-82.
35. Barabasi, A.L., N. Gulbahce, and J. Loscalzo, *Network medicine: a network-based approach to human disease*. Nat Rev Genet, 2011. **12**(1): p. 56-68.
36. Scott, D.E., et al., *Small molecules, big targets: drug discovery faces the protein-protein interaction challenge*. Nat Rev Drug Discov, 2016. **15**(8): p. 533-50.
37. Arkin, M.R., Y. Tang, and J.A. Wells, *Small-molecule inhibitors of protein-protein interactions: progressing toward the reality*. Chem Biol, 2014. **21**(9): p. 1102-14.
38. Rooklin, D., et al., *AlphaSpace: Fragment-Centric Topographical Mapping To Target Protein-Protein Interaction Interfaces*. J Chem Inf Model, 2015. **55**(8): p. 1585-99.
39. Lampson, B.L. and M.S. Davids, *The Development and Current Use of BCL-2 Inhibitors for the Treatment of Chronic Lymphocytic Leukemia*. Curr Hematol Malig Rep, 2017. **12**(1): p. 11-19.
40. *VENCLEXTA combination regimens for CLL work through 2 distinct cytotoxic mechanisms of action*. 2019; Available from: <https://www.venclextahcp.com/ctl/venclexta-efficacy/mechanism-of-action.html>.
41. Schormann, N., et al., *Identification of protein-protein interaction inhibitors targeting vaccinia virus processivity factor for development of antiviral agents*. Antimicrob Agents Chemother, 2011. **55**(11): p. 5054-62.
42. White, P.W., et al., *Inhibition of human papillomavirus DNA replication by small molecule antagonists of the E1-E2 protein interaction*. J Biol Chem, 2003. **278**(29): p. 26765-72.
43. Goudreau, N., et al., *Optimization and determination of the absolute configuration of a series of potent inhibitors of human papillomavirus type-11 E1-E2 protein-protein interaction: a combined medicinal chemistry, NMR and computational chemistry approach*. Bioorg Med Chem, 2007. **15**(7): p. 2690-700.
44. Brito, A.F. and J.W. Pinney, *Protein-Protein Interactions in Virus-Host Systems*. Front Microbiol, 2017. **8**: p. 1557.
45. Meyer, M.J., et al., *Interactome INSIDER: a structural interactome browser for genomic studies*. Nat Methods, 2018. **15**(2): p. 107-114.



46. Chaudhury, S., S. Lyskov, and J.J. Gray, *PyRosetta: a script-based interface for implementing molecular modeling algorithms using Rosetta*. *Bioinformatics*, 2010. **26**(5): p. 689-91.
47. Kirchdoerfer, R.N., et al., *Stabilized coronavirus spikes are resistant to conformational changes induced by receptor recognition or proteolysis*. *Sci Rep*, 2018. **8**(1): p. 15701.
48. Wang, Q., et al., *Structural and Functional Basis of SARS-CoV-2 Entry by Using Human ACE2*. *Cell*, 2020. **181**(4): p. 894-904 e9.
49. Wrobel, A.G., et al., *SARS-CoV-2 and bat RaTG13 spike glycoprotein structures inform on virus evolution and furin-cleavage effects*. *Nat Struct Mol Biol*, 2020. **27**(8): p. 763-767.
50. Walls, A.C., et al., *Structure, Function, and Antigenicity of the SARS-CoV-2 Spike Glycoprotein*. *Cell*, 2020. **181**(2): p. 281-292 e6.
51. Alford, R.F., et al., *The Rosetta All-Atom Energy Function for Macromolecular Modeling and Design*. *J Chem Theory Comput*, 2017. **13**(6): p. 3031-3048.
52. Shang, J., et al., *Structural basis of receptor recognition by SARS-CoV-2*. *Nature*, 2020. **581**(7807): p. 221-224.
53. Wrapp, D., et al., *Cryo-EM structure of the 2019-nCoV spike in the prefusion conformation*. *Science*, 2020. **367**(6483): p. 1260-1263.
54. Jordan, R.E. and P. Adab, *Who is most likely to be infected with SARS-CoV-2? The Lancet Infectious Diseases*, 2020. **20**(9): p. 995-996.
55. Cao, Y., et al., *Comparative genetic analysis of the novel coronavirus (2019-nCoV/SARS-CoV-2) receptor ACE2 in different populations*. *Cell Discov*, 2020. **6**: p. 11.
56. Darbeheshti, F. and N. Rezaei, *Genetic predisposition models to COVID-19 infection*. *Med Hypotheses*, 2020. **142**: p. 109818.
57. Zhao, Y., et al., 2020.
58. Karczewski, K.J., et al., *The mutational constraint spectrum quantified from variation in 141,456 humans*. *Nature*, 2020. **581**(7809): p. 434-443.
59. Kortemme, T. and D. Baker, *A simple physical model for binding energy hot spots in protein-protein complexes*. *Proc Natl Acad Sci U S A*, 2002. **99**(22): p. 14116-21.
60. Shulman-Peleg, A., et al., *Spatial chemical conservation of hot spot interactions in protein-protein complexes*. *BMC Biol*, 2007. **5**: p. 43.
61. Stawiski, B. and T. Kania, *Tests of Concrete Strength across the Thickness of Industrial Floor Using the Ultrasonic Method with Exponential Spot Heads*. *Materials (Basel)*, 2020. **13**(9).
62. Procko, E., *The sequence of human ACE2 is suboptimal for binding the S spike protein of SARS coronavirus 2*. *bioRxiv*, 2020.
63. Guharoy, M. and P. Chakrabarti, *Conserved residue clusters at protein-protein interfaces and their use in binding site identification*. *BMC Bioinformatics*, 2010. **11**: p. 286.
64. Gupta, R., et al., *SARS-CoV2 (COVID-19) Structural/Evolution Dynamicome: Insights into functional evolution and human genomics*. *bioRxiv*, 2020.
65. Stenson, P.D., et al., *Human Gene Mutation Database (HGMD): 2003 update*. *Hum Mutat*, 2003. **21**(6): p. 577-81.
66. Landrum, M.J., et al., *ClinVar: improving access to variant interpretations and supporting evidence*. *Nucleic Acids Res*, 2018. **46**(D1): p. D1062-D1067.

67. Buniello, A., et al., *The NHGRI-EBI GWAS Catalog of published genome-wide association studies, targeted arrays and summary statistics 2019*. Nucleic Acids Res, 2019. **47**(D1): p. D1005-D1012.
68. Killerby, M.E., et al., *Characteristics Associated with Hospitalization Among Patients with COVID-19 - Metropolitan Atlanta, Georgia, March-April 2020*. MMWR Morb Mortal Wkly Rep, 2020. **69**(25): p. 790-794.
69. Yang, J., et al., *Prevalence of comorbidities and its effects in patients infected with SARS-CoV-2: a systematic review and meta-analysis*. Int J Infect Dis, 2020. **94**: p. 91-95.
70. Sahni, N., et al., *Widespread macromolecular interaction perturbations in human genetic disorders*. Cell, 2015. **161**(3): p. 647-660.
71. Wang, X., et al., *Three-dimensional reconstruction of protein networks provides insight into human genetic disease*. Nat Biotechnol, 2012. **30**(2): p. 159-64.
72. Sim, N.L., et al., *SIFT web server: predicting effects of amino acid substitutions on proteins*. Nucleic Acids Res, 2012. **40**(Web Server issue): p. W452-7.
73. Adzhubei, I.A., et al., *A method and server for predicting damaging missense mutations*. Nat Methods, 2010. **7**(4): p. 248-9.
74. von Brunn, A., et al., *Analysis of intraviral protein-protein interactions of the SARS coronavirus ORF6*. PLoS One, 2007. **2**(5): p. e459.
75. Vogel, R.O., et al., *Human mitochondrial complex I assembly is mediated by NDUFAF1*. FEBS J, 2005. **272**(20): p. 5317-26.
76. Janssen, R., et al., *CIA30 complex I assembly factor: a candidate for human complex I deficiency?* Hum Genet, 2002. **110**(3): p. 264-70.
77. Sivan, G., et al., *Human genome-wide RNAi screen reveals a role for nuclear pore proteins in poxvirus morphogenesis*. Proc Natl Acad Sci U S A, 2013. **110**(9): p. 3519-24.
78. Kaminski, M.M., et al., *Mitochondrial reactive oxygen species control T cell activation by regulating IL-2 and IL-4 expression: mechanism of ciprofloxacin-mediated immunosuppression*. J Immunol, 2010. **184**(9): p. 4827-41.
79. van der Made, C.I., et al., *Presence of Genetic Variants Among Young Men With Severe COVID-19*. JAMA, 2020.
80. Tutuncuoglu, B., et al., *The Landscape of Human Cancer Proteins Targeted by SARS-CoV-2*. Cancer Discov, 2020. **10**(7): p. 916-921.
81. Lipovsky, A., et al., *Genome-wide siRNA screen identifies the retromer as a cellular entry factor for human papillomavirus*. Proc Natl Acad Sci U S A, 2013. **110**(18): p. 7452-7.
82. Filone, C.M., et al., *The master regulator of the cellular stress response (HSF1) is critical for orthopoxvirus infection*. PLoS Pathog, 2014. **10**(2): p. e1003904.
83. Warner, N., et al., *A genome-wide small interfering RNA (siRNA) screen reveals nuclear factor-kappaB (NF-kappaB)-independent regulators of NOD2-induced interleukin-8 (IL-8) secretion*. J Biol Chem, 2014. **289**(41): p. 28213-24.
84. Huttlin, E.L., et al., *Architecture of the human interactome defines protein communities and disease networks*. Nature, 2017. **545**(7655): p. 505-509.
85. Sun, M.S., et al., *TMED2 Potentiates Cellular IFN Responses to DNA Viruses by Reinforcing MITA Dimerization and Facilitating Its Trafficking*. Cell Rep, 2018. **25**(11): p. 3086-3098 e3.

86. Sicari, D., et al., *Role of the early secretory pathway in SARS-CoV-2 infection*. J Cell Biol, 2020. **219**(9).
87. Liu, X.Y., et al., *Tom70 mediates activation of interferon regulatory factor 3 on mitochondria*. Cell Res, 2010. **20**(9): p. 994-1011.
88. Fellay, J., et al., *A whole-genome association study of major determinants for host control of HIV-1*. Science, 2007. **317**(5840): p. 944-7.
89. Fragoza, R., et al., *Extensive disruption of protein interactions by genetic variants across the allele frequency spectrum in human populations*. Nat Commun, 2019. **10**(1): p. 4141.
90. Eswar, N., et al., *Comparative protein structure modeling using Modeller*. Curr Protoc Bioinformatics, 2006. **Chapter 5**: p. Unit-5 6.
91. Altschul, S.F., et al., *Basic local alignment search tool*. J Mol Biol, 1990. **215**(3): p. 403-10.
92. Berman, H.M., et al., *The Protein Data Bank*. Nucleic Acids Res, 2000. **28**(1): p. 235-42.
93. Mosca, R., A. Ceol, and P. Aloy, *Interactome3D: adding structural details to protein networks*. Nat Methods, 2013. **10**(1): p. 47-53.
94. Gasteiger, E., et al., *Protein Identification and Analysis Tools on the ExPASy Server*. (In) John M. Walker (ed): The Proteomics Protocols Handbook, Humana Press (2005), 2005: p. 571-607.
95. Lin, J., *Divergence measures based on the Shannon entropy*. IEEE Transactions on Information Theory, 1991. **37**(1): p. 145-151.
96. Capra, J.A. and M. Singh, *Predicting functionally important residues from sequence conservation*. Bioinformatics, 2007. **23**(15): p. 1875-82.
97. Morcos, F., et al., *Direct coupling analysis for protein contact prediction*. Methods Mol Biol, 2014. **1137**: p. 55-70.
98. Lockless, S.W. and R. Ranganathan, *Evolutionarily conserved pathways of energetic connectivity in protein families*. Science, 1999. **286**(5438): p. 295-9.
99. Pieper, U., et al., *ModBase, a database of annotated comparative protein structure models and associated resources*. Nucleic Acids Res, 2014. **42**(Database issue): p. D336-46.
100. Lee, B. and F.M. Richards, *The interpretation of protein structures: estimation of static accessibility*. J Mol Biol, 1971. **55**(3): p. 379-400.
101. Pierce, B.G., Y. Hourai, and Z. Weng, *Accelerating protein docking in ZDOCK using an advanced 3D convolution library*. PLoS One, 2011. **6**(9): p. e24657.
102. Pedregosa, F., et al., *Scikit-learn: Machine Learning in Python*. Journal of Machine Learning Research, 2011. **12**(1532-4435): p. 2825–2830.
103. Gray, J.J., *High-resolution protein-protein docking*. Curr Opin Struct Biol, 2006. **16**(2): p. 183-93.
104. UniProt, C., *UniProt: a worldwide hub of protein knowledge*. Nucleic Acids Res, 2019. **47**(D1): p. D506-D515.
105. He, R., et al., *Analysis of multimerization of the SARS coronavirus nucleocapsid protein*. Biochem Biophys Res Commun, 2004. **316**(2): p. 476-83.
106. Wu, F., et al., *A new coronavirus associated with human respiratory disease in China*. Nature, 2020. **579**(7798): p. 265-269.
107. Chan, J.F., et al., *Genomic characterization of the 2019 novel human-pathogenic coronavirus isolated from a patient with atypical pneumonia after visiting Wuhan*. Emerg Microbes Infect, 2020. **9**(1): p. 221-236.

108. Needleman, S.B. and C.D. Wunsch, *A general method applicable to the search for similarities in the amino acid sequence of two proteins*. J Mol Biol, 1970. **48**(3): p. 443-53.
109. Henikoff, S. and J.G. Henikoff, *Amino acid substitution matrices from protein blocks*. Proc Natl Acad Sci U S A, 1992. **89**(22): p. 10915-9.
110. McLaren, W., et al., *The Ensembl Variant Effect Predictor*. Genome Biol, 2016. **17**(1): p. 122.
111. Szumilas, M., *Explaining odds ratios*. J Can Acad Child Adolesc Psychiatry, 2010. **19**(3): p. 227-9.
112. Machiela, M.J. and S.J. Chanock, *LDlink: a web-based application for exploring population-specific haplotype structure and linking correlated alleles of possible functional variants*. Bioinformatics, 2015. **31**(21): p. 3555-7.
113. O'Boyle, N.M., et al., *Open Babel: An open chemical toolbox*. J Cheminform, 2011. **3**: p. 33.
114. Koes, D.R., M.P. Baumgartner, and C.J. Camacho, *Lessons learned in empirical scoring with smina from the CSAR 2011 benchmarking exercise*. J Chem Inf Model, 2013. **53**(8): p. 1893-904.

557 **Supplemental Table Headings**

558 **Supplemental Table 1. List of ECLAIR predicted interface residues.**

559 **Supplemental Table 2. List of guided docking annotated interface residues.**

560 **Supplemental Table 3. List of human population variants reported by gnomAD.**

561 **Supplemental Table 4. List of sequence divergences between SARS-CoV and SARS-CoV-2.**

562 **Supplemental Table 5. Enrichment for sequence variation on SARS-CoV-2-human interfaces.**

563 **Supplemental Table 6. Enrichment for individual disease terms in human interactors of SARS-**

564 **CoV-2.**

565 **Supplemental Table 7. Predicted  $\Delta\Delta G$  between SARS-CoV and SARS-CoV-2 versions of all**

566 **docked interactions.**

567 **Supplemental Table 8. Predicted  $\Delta\Delta G$  impact of all human population variants at the interface.**

568 **Supplemental Table 9. List of all predicted drug-target binding sites .**



# Figure 1

bioRxiv preprint doi: <https://doi.org/10.1101/2020.10.13.308676>; this version posted October 13, 2020. The copyright holder for this preprint (which was not certified by peer review) is the author/funder, who has granted bioRxiv a license to display the preprint in perpetuity. It is made available under aCC-BY-NC-ND 4.0 International license.

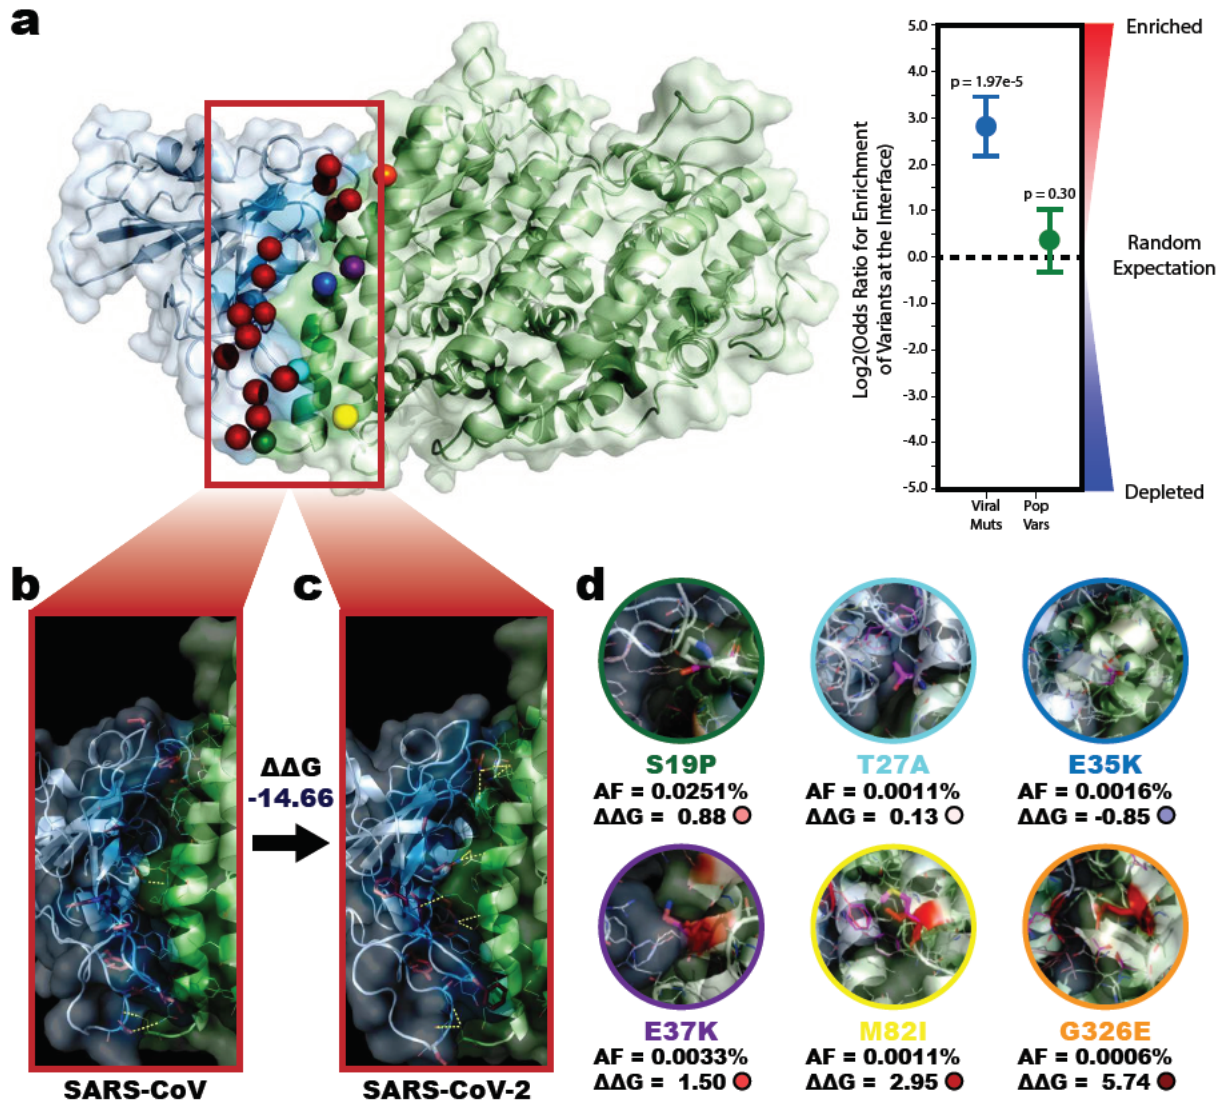

569 **Figure 1. Enrichment and predicted impact of divergences between SARS-CoV and SARS-CoV-2**  
570 **along the S-ACE2 interface.**

571 **a**, Co-crystal structure of the interaction between SARS-CoV-2 Spike protein (S) with human ACE2  
572 (PDB 6LZG). All 15 sequence divergences between SARS-CoV and SARS-CoV-2 Spike protein  
573 interfaces are highlighted as red spheres while all 6 population variants on the ACE2 protein interface  
574 are highlighted as green (ACE2\_S19P), cyan (ACE2\_T27A), blue (ACE2\_E35K), purple (ACE2\_E37K),  
575 yellow (ACE2\_M82I), and orange (ACE2\_G326E) spheres. Enrichment of these variants on the interface  
576 are reported for SARS-CoV-2 (Log2OR=2.82, p=1.97e-5) and human (Log2OR=0.38, p=0.30) shown to  
577 the right. Error bars indicate  $\pm$  SE. **b, c**, Zoomed in interface views for the SARS-CoV S-ACE2 structure  
578 (PDB 6CS2) and SARS-CoV-2 S-ACE2 structure (PDB 6LZG). Sequence divergences between the two  
579 Spike proteins are highlighted as red sticks. Inter-protein polar contacts that contribute to stabilizing the  
580 interaction are shown as yellow dashed lines. The binding energy ( $\Delta G$ ) of each interaction was  
581 estimated using PyRosetta and the change in this binding energy ( $\Delta\Delta G$ ) is reported. The negative value  
582 ( $\Delta\Delta G=-14.66$  Rosetta Energy Units (REU)) indicates the interaction is more stable (lower energy) in the  
583 SARS-CoV-2 version of the interaction. **d**, Comparison of the impact of each of the ACE2 population  
584 variants. Mutated structures containing the population variant are shown over the original structure  
585 (magenta). The mutated residue is shown as sticks. Residues whose predicted impact on binding energy  
586 was affected are colored from blue (decreased  $\Delta\Delta G$ ) to white (no change) to red (increased  $\Delta\Delta G$ ). The  
587 gnomAD reported allele frequency and predicted  $\Delta\Delta G$  for each mutation are reported. Outlines of each  
588 structures are consistent with the spheres in **a**.

# Figure 2

bioRxiv preprint doi: <https://doi.org/10.1101/2020.10.13.308676>; this version posted October 13, 2020. The copyright holder for this preprint (which was not certified by peer review) is the author/funder, who has granted bioRxiv a license to display the preprint in perpetuity. It is made available under aCC-BY-NC-ND 4.0 International license.

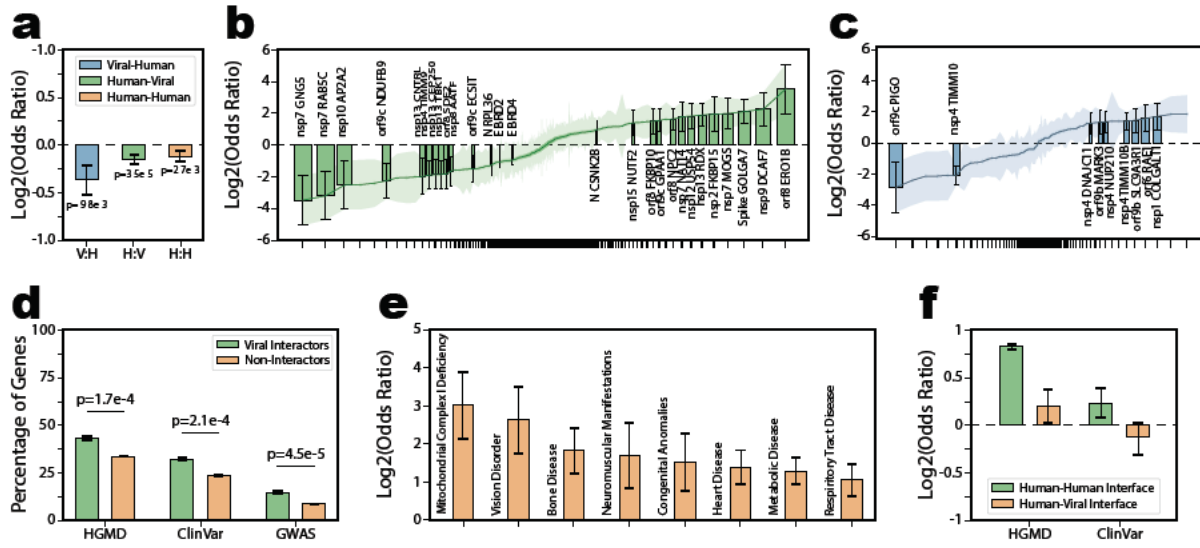



589 **Figure 2. Enrichment of sequence divergences and disease mutations across all SARS-CoV-2-**  
590 **Human interaction interfaces.**

591 **a**, Overall enrichment for viral sequence divergence along viral-human (V:H,  $\text{Log}_2\text{OR}=-0.37$ ,  $p=9.76e-$   
592  $3$ ) interfaces and human population variants along human-viral (H:V,  $\text{Log}_2\text{OR}=-0.16$ ,  $p=3.47e-5$ ) or  
593 human-human (H:H,  $\text{Log}_2\text{OR}=-0.13$ ,  $p=2.67e-3$ ) interfaces at an interactome level. Error bars indicate  
594  $\pm$  SE. **b, c**, Individual enrichment for human population variants and viral sequence divergences  
595 respectively on all SARS-CoV-2-human interaction interfaces. Interactions are sorted from most  
596 depleted to most enriched. The x-axis is skewed to compress non-significant interactions. Only  
597 interfaces with statistically significant enrichment or depletion are shown as bars and labeled. The  
598 remainder are shown as  $\text{Log}_2\text{OR}$  (line) and error bars (colored area). Error bars indicate  $\pm$  SE. **d**,  
599 Comparison of the percentage of human genes that interact with (green) or do not interact with (orange)  
600 SARS-CoV-2 that contain disease annotations in HGDM ( $\text{Log}_2\text{OR}=0.57$ ,  $p=1.70e-4$ ), ClinVar  
601 ( $\text{Log}_2\text{OR}=0.64$ ,  $p=1.05e-4$ ), and GWAS ( $\text{Log}_2\text{OR}=0.89$ ,  $p=4.54e-5$ ) respectively. Genes targeted by  
602 SARS-CoV-2 proteins were significantly more likely to harbor disease mutations than non-interactors.  
603 Error bars indicate  $\pm$  SE. **e**, A sample of individual disease terms enriched in human genes targeted by  
604 SARS-CoV-2. Full results are reported in **Supplemental Table 6**. Error bars indicate  $\pm$  SE. **f**,  
605 Comparison of the enrichment of HGDM, ClinVar, and GWAS annotated mutations on human-viral  
606 interfaces or human-human interfaces for the same gene set. Although disease mutations were enriched  
607 on human-human interfaces (HGDM,  $\text{Log}_2\text{OR}=0.82$ ,  $p<1e-20$ ; ClinVar,  $\text{Log}_2\text{OR}=-0.13$ ,  $p=0.24$ ), no  
608 enrichment was observed on human-viral interfaces (HGDM,  $\text{Log}_2\text{OR}=0.21$ ,  $p=0.13$ ; ClinVar,  
609  $\text{Log}_2\text{OR}=0.51$ ,  $p<e-20$ ). The GWAS category was removed from this analysis because most lead GWAS  
610 SNPs occurred in non-coding regions. Error bars indicate  $\pm$  SE.

# Figure 3

bioRxiv preprint doi: <https://doi.org/10.1101/2020.10.13.308676>; this version posted October 13, 2020. The copyright holder for this preprint (which was not certified by peer review) is the author/funder, who has granted bioRxiv a license to display the preprint in perpetuity. It is made available under aCC-BY-NC-ND 4.0 International license.

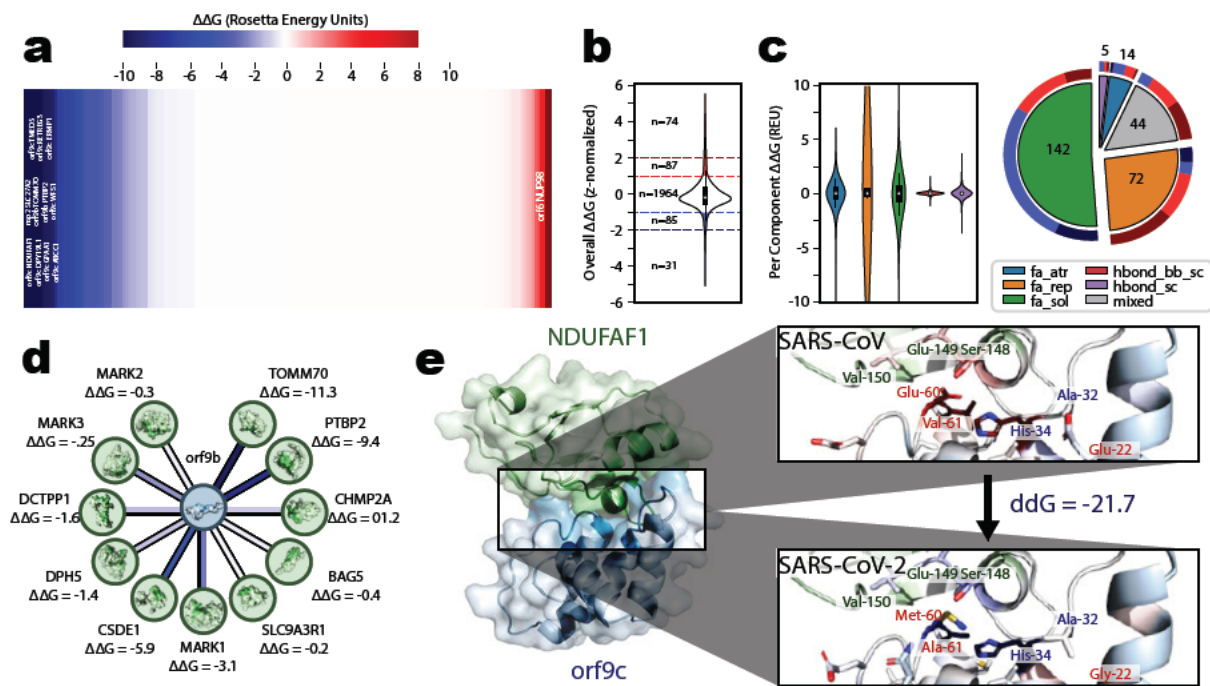

611 **Figure 3. Predicted impact of sequence divergences on the binding affinity of SARS-CoV-2-**  
612 **Human interactions.**

613 **a**, Predicted changes in binding affinity from sequence divergences between SARS-CoV and SARS-  
614 CoV-2 on SARS-CoV-2-human interactions were predicted in PyRosetta. An overall representation of  
615 these  $\Delta\Delta G$  predictions is reported (mean=-1.40 REU, std=6.16 REU) with interactions sorted from those  
616 with the largest decrease in binding energy (most stabilized relative to SARS-CoV) to those with the  
617 largest increase in binding energy (most destabilized relative to SARS-CoV). Outlier interactions with  
618 the change in binding energy at least one standard deviation from the mean are labeled. **b**, Distribution  
619 of the predicted binding affinity change from all human population variants on a SARS-CoV-2-human  
620 interface. Values were z-score normalized across each interface. Interface binding energy hotspots  
621 were binned as strongly disruptive (z-score  $\geq 2$ , n=74), disruptive ( $1 \leq$  z-score  $< 2$ , n=87), stabilizing ( $-$   
622  $2 <$  z-score  $\leq -1$ , n=85), or strongly stabilizing (z-score  $\leq -2$ , n=31). All other population variants ( $-1 <$  z-  
623 score  $< 1$ , n=1,964) showed minimal impact of binding affinity. **c**, Breakdown of the contribution of each  
624 term in the PyRosetta energy function used for in-silico scanning mutagenesis for all population variants.  
625 Distributions for each term are shown on the left. A breakdown of which term contributed most heavily  
626 to the classification of all 277 interface hotspot population variants is shown on the right. **d**, Individual  
627 SARS-CoV-2-human interactions involving the same viral protein can have distinct interfaces with  
628 distinct predicted changes in binding affinity between SARS-CoV and SARS-CoV-2 versions of the  
629 protein. An example involving orf9b is highlighted where some interactions (e.g. TOMM70 and PTBP2)  
630 are predicted to be more stabilized in SARS-CoV-2 whereas others (e.g. BAG5, SLC9A3R1, and  
631 MARK2) are predicted to be unaffected. **e**, Docked structure for the interaction between SARS-CoV-2  
632 orf9c and human NDUFAF1, alongside comparisons of the predicted interface using SARS-CoV (top)  
633 or SARS-CoV-2 (bottom) orf9c. Interface residues are colored by their predicted energy contribution  
634 from blue (stabilizing) to white (no impact) to red (destabilizing). Residues that differ between SARS-  
635 CoV and SARS-CoV-2 are labeled in red, while other residues with a major contribution to the binding  
636 affinity are labeled in green (NDUFAF1) or blue (orf9c). The overall predicted change in binding energy  
637 ( $\Delta\Delta G=-21.7$  REU) suggests the interaction is more stable (lower energy) in the SARS-CoV-2 version of  
638 the interaction.

639 **Figure 4. Drug Docking and Prioritization of SARS-CoV-2-Human Interaction Inhibitors**

# Figure 5

bioRxiv preprint doi: <https://doi.org/10.1101/2020.10.13.308676>; this version posted October 13, 2020. The copyright holder for this preprint (which was not certified by peer review) is the author/funder, who has granted bioRxiv a license to display the preprint in perpetuity. It is made available under aCC-BY-NC-ND 4.0 International license.

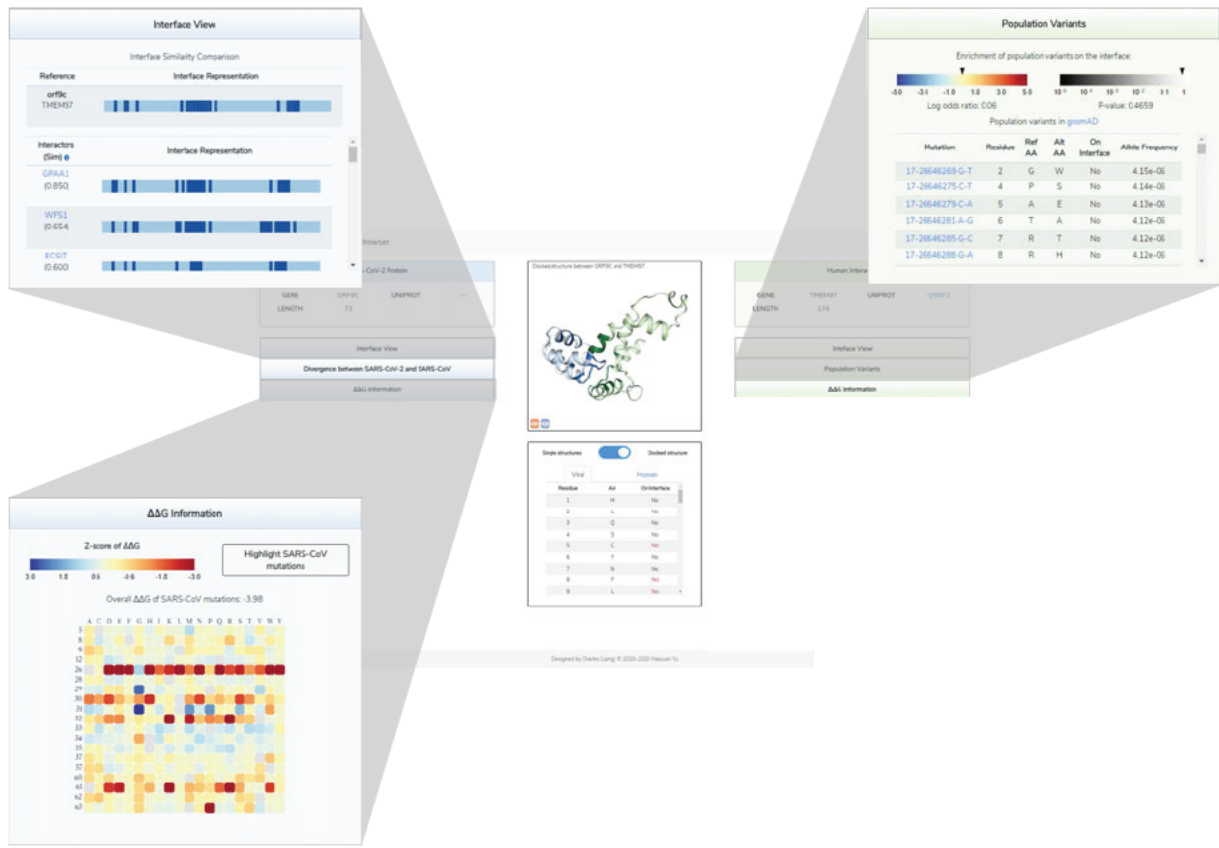

640 **Figure 5. 3D-SARS2 Structural Interactome Browser Overview.**

641 Overview of the main results page for exploring a given interaction in our 3D-SARS2 structural  
642 interactome browser. The main display contains information for both the SARS-CoV-2 and human  
643 proteins including structural displays for either the docked or single crystal structures as well as a table  
644 summarizing the interface residues for both proteins. Interface residues are colored dark blue and dark  
645 green for the viral and human proteins respectively. By default the page will display the docked structure  
646 if available. The display can be toggled between docked structures and single structures using the  
647 button in the bottom middle. When single structures display is selected residues will instead be colored  
648 based on the initial ECLAIR interface definition. Four categories of expandable panels containing  
649 additional analyses are provided. **upper left**, The interface view shows a linear representation of the  
650 protein sequence with interface residues annotated in dark blue or dark green. Interfaces for other  
651 interactors of the protein are shown underneath for easy comparison. **upper right**, The mutations panel  
652 summarizes either human population variants or viral sequence divergences on the protein. Mutations  
653 on the interface are labeled. **lower left**, The  $\Delta\Delta G$  information panel summarizes the results from in-  
654 silico mutagenesis scanning along the interface. Results for each mutation are z-score normalized  
655 relative to the rest of the interface and colored on a blue (negative  $\Delta\Delta G$ , stabilizing) to yellow (minimal  
656 impact) to red (positive  $\Delta\Delta G$ , destabilizing). The heatmap can be filtered to only show values  
657 corresponding to known mutations on the interface.

# Supplemental Figure 1

bioRxiv preprint doi: <https://doi.org/10.1101/2020.10.13.305676>; this version posted October 13, 2020. The copyright holder for this preprint (which was not certified by peer review) is the author/funder, who has granted bioRxiv a license to display the preprint in perpetuity. It is made available under a [CC-BY-NC-ND 4.0 International license](https://creativecommons.org/licenses/by-nc-nd/4.0/).

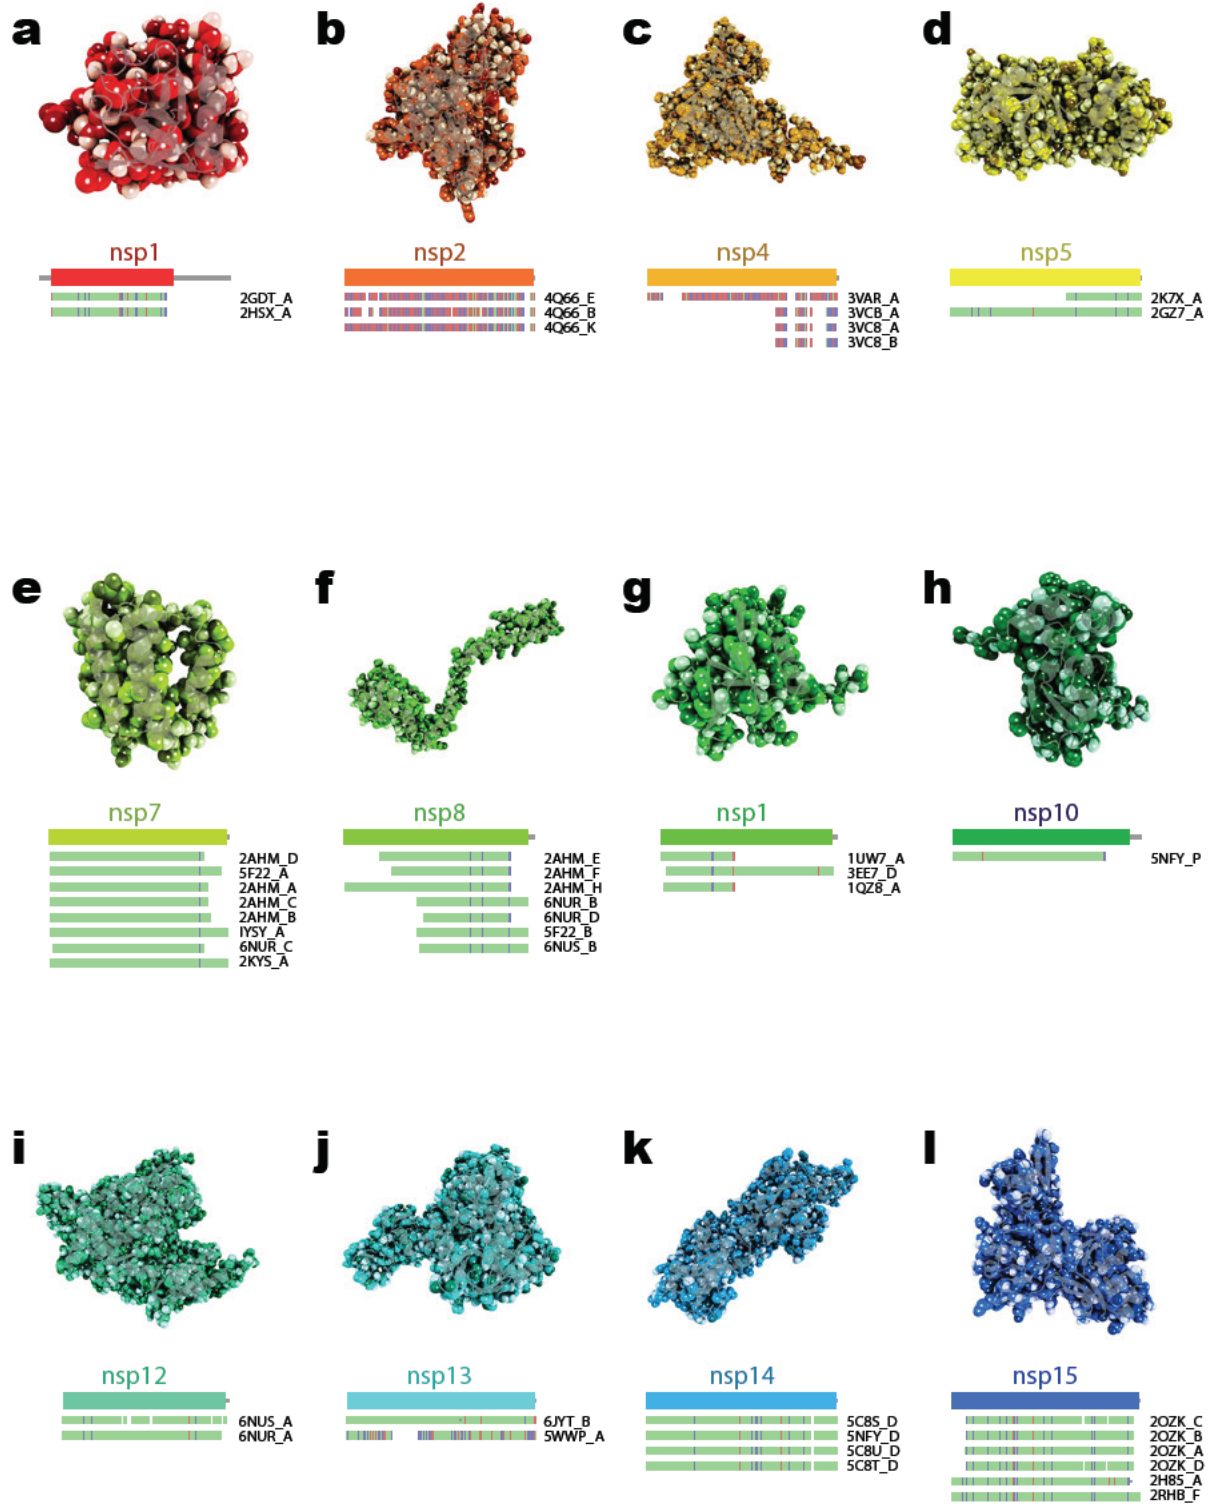



# Supplemental Figure 1

bioRxiv preprint doi: <https://doi.org/10.1101/2020.10.13.305676>; this version posted October 13, 2020. The copyright holder for this preprint (which was not certified by peer review) is the author/funder, who has granted bioRxiv a license to display the preprint in perpetuity. It is made available under a [CC-BY-NC-ND 4.0 International license](https://creativecommons.org/licenses/by-nc-nd/4.0/).

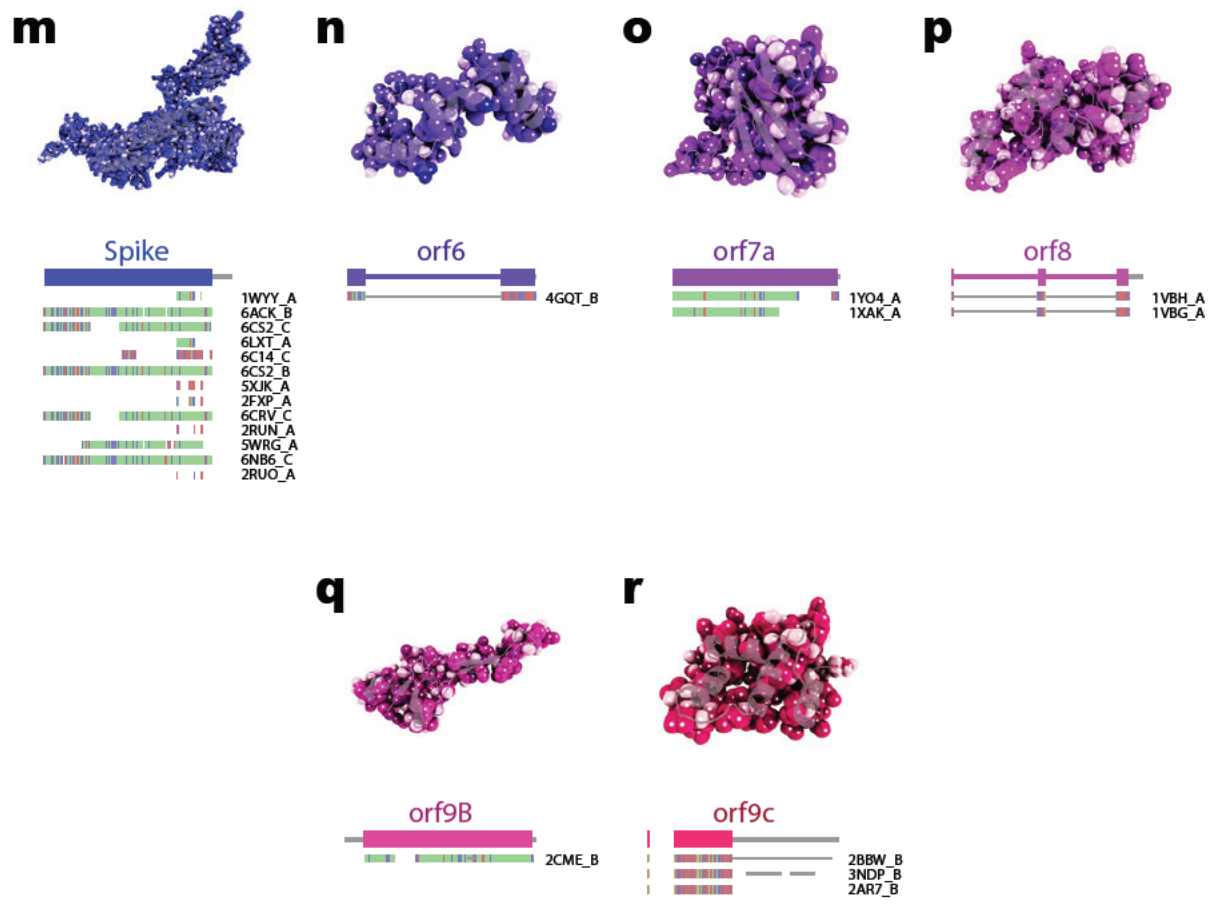

658 **Supplemental Figure 1. Homology modeling for SARS-CoV-2 proteins.**

659 **a-r**, Homology models for 18 SARS-CoV-2 proteins amenable to homology modeling. The first bar under  
660 each model indicates the overall coverage of the SARS-CoV-2 protein. The underlying bars indicate  
661 template utilization across the structure. The template bars are colored based on the alignment between  
662 the template and the corresponding SARS-CoV-2 where green indicates identical sequence, blue  
663 indicates a mismatch with positive BLOSUM substitution score, and red indicates a mismatch with a  
664 negative BLOSUM substitution score.

# Supplemental Figure 2

bioRxiv preprint doi: <https://doi.org/10.1101/2020.10.13.305676>; this version posted October 13, 2020. The copyright holder for this preprint (which was not certified by peer review) is the author/funder, who has granted bioRxiv a license to display the preprint in perpetuity. It is made available under a [CC-BY-NC-ND 4.0 International license](https://creativecommons.org/licenses/by-nc-nd/4.0/).

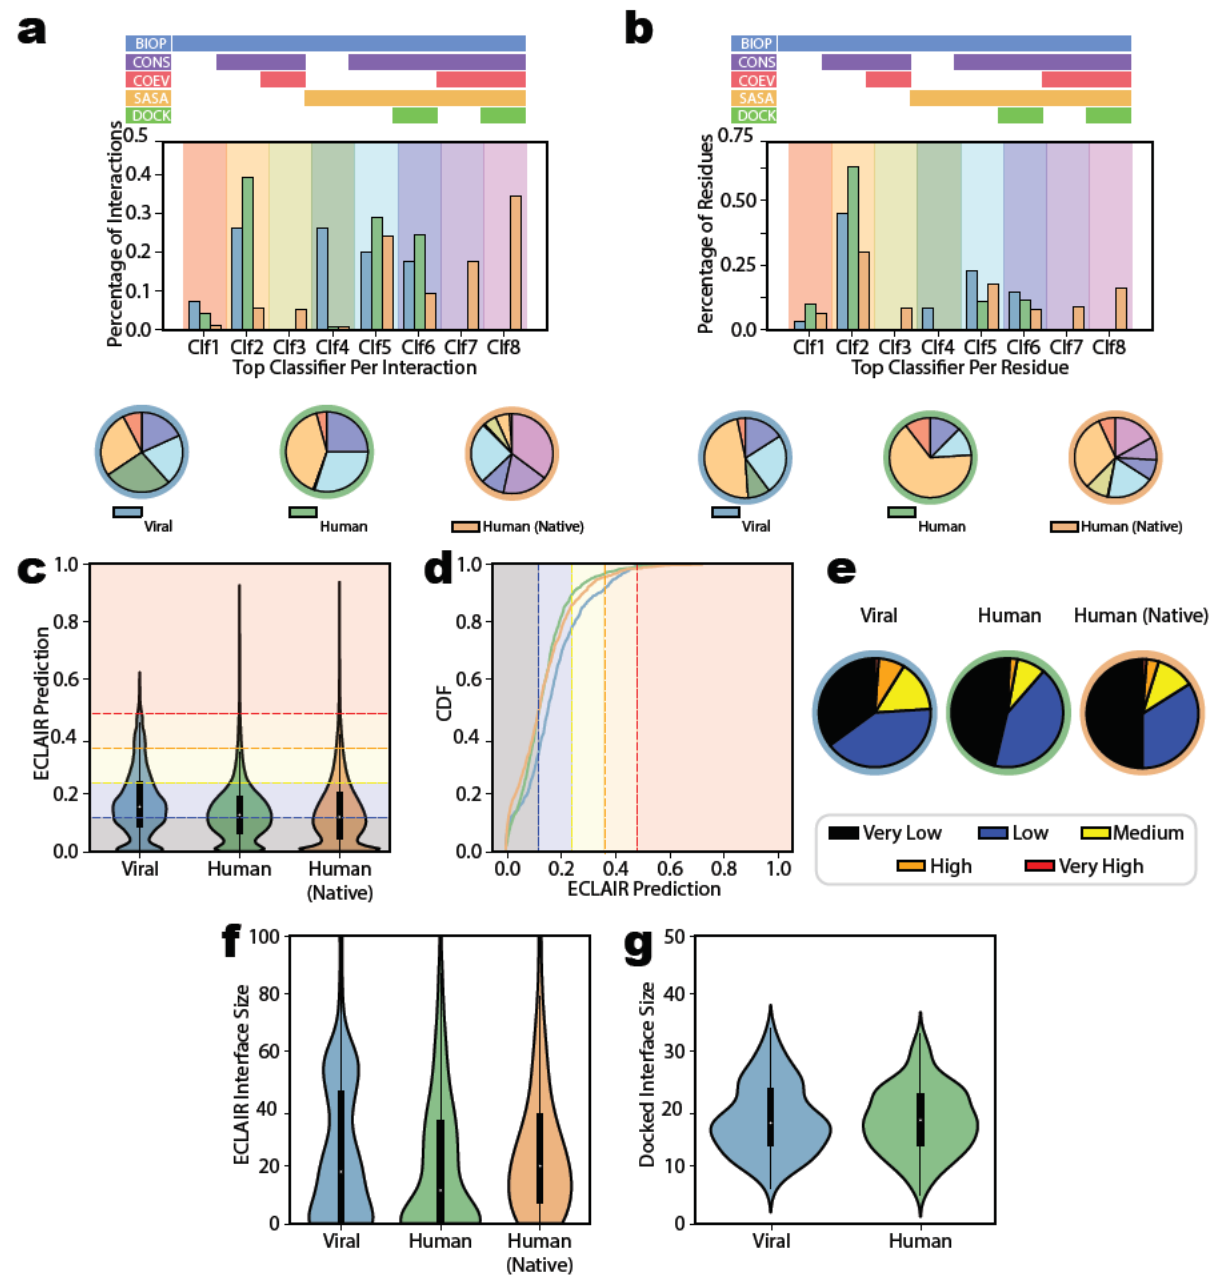

665 **Supplemental Figure 2. Summary of ECLAIR and guided docking interface predictions.**

666 **a**, Breakdown of best ECLAIR classifier used in interface prediction per interaction. The top section  
667 indicates which features are used by each classifier. The total breakdown of classifier usage for  
668 prediction of viral interfaces (blue) and human interfaces on human-viral (green) or native human-human  
669 (orange) interactions are shown either in bar plot (middle) or as pie charts (bottom). **b**, Identical  
670 breakdown, but reported at a per-residue rather than per-interaction level. **c**, **d**, Summary of ECLAIR  
671 prediction scores across viral, human, and native human-human interfaces presented as either a raw  
672 distribution or a cumulative density respectively. Plots are colored based on corresponding ECLAIR  
673 confidence bins in each range of the plot. **e**, Breakdown of the overall ECLAIR confidence bin  
674 representation among the three classes. Overall, ECLAIR classification predictions were generally  
675 similar between the three classes of interface, although a higher fraction of predictions made on viral  
676 interfaces were made with high or medium confidence. **f**, Distribution of the size of all interfaces defined  
677 by ECLAIR compared among the three classes. **g**, Distribution of viral or human interfaces defined by  
678 guided docking.

# Supplemental Figure 3

bioRxiv preprint doi: <https://doi.org/10.1101/2020.10.13.305676>; this version posted October 13, 2020. The copyright holder for this preprint (which was not certified by peer review) is the author/funder, who has granted bioRxiv a license to display the preprint in perpetuity. It is made available under aCC-BY-NC-ND 4.0 International license.

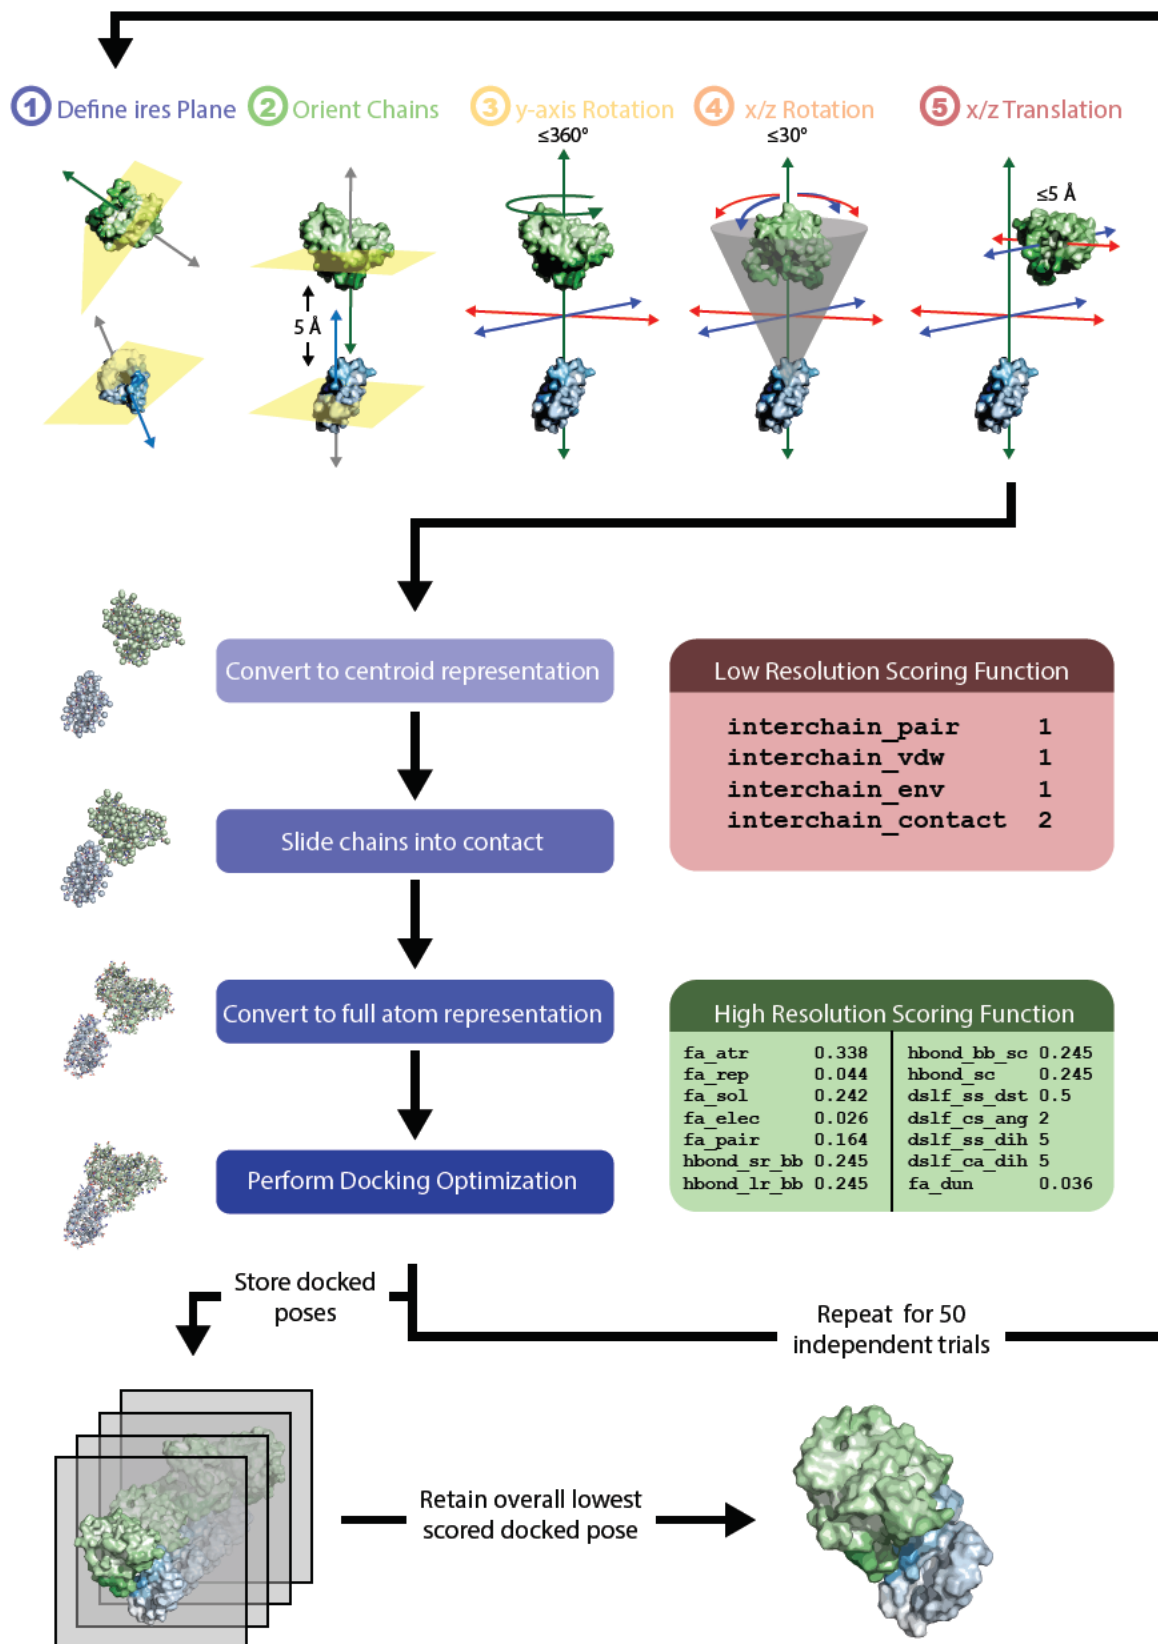

679 **Supplemental Figure 3. Visual representation of the guided docking protocol used.**

680 For each SARS-CoV-2-human interaction with 3D structure available for both proteins, 50 independent  
681 guiding docking trials were used to select a final docked configuration. The structure for the viral protein  
682 is colored from white to blue with darker blue corresponding to higher ECLAIR prediction. The structure  
683 for the human protein is colored similarly using a green to white gradient. Initial semi-random docked  
684 configurations were generated using five steps. First a plane separating ECLAIR predicted likely  
685 interface from likely non-interface residues was drawn to divide each protein. Second, the two protein  
686 chains were separated 5 Å apart on the y-axis using the previously defined plane to orient the likely  
687 interface sides of each protein towards each other. Third, the human protein was randomly rotated up  
688 to 360° along the y-axis to sample different orientations of the two interfaces relative to each other.  
689 Fourth, the human protein was randomly rotated up to 30° along the x- and z-axes with the point of  
690 rotation centered on the viral protein. Fifth a random translation up to 5 Å was applied to the human  
691 protein along the x- and z-axes. The first two steps constitute the ECLAIR-based guiding of the docking  
692 space. The last three steps serve to randomly perturb the initial docking configurations to sample the  
693 space near the ECLAIR predicted interface. After this initial perturbation docking is performed using a  
694 combination of low resolution and high-resolution scoring. During the low-resolution scoring, the proteins  
695 are initially converted to a centroid representation and slid into contact. During the high-resolution  
696 scoring, the proteins are converted back to a full-atom representation and the contact and side-chain  
697 packing is optimized. The best (lowest) scored docked pose is retained and used for docked interface  
698 definition.

# Supplemental Figure 4

bioRxiv preprint doi: <https://doi.org/10.1101/2020.10.13.306076>; this version posted October 13, 2020. The copyright holder for this preprint (which was not certified by peer review) is the author/funder, who has granted bioRxiv a license to display the preprint in perpetuity. It is made available under a [CC-BY-NC-ND 4.0 International license](https://creativecommons.org/licenses/by-nc-nd/4.0/).

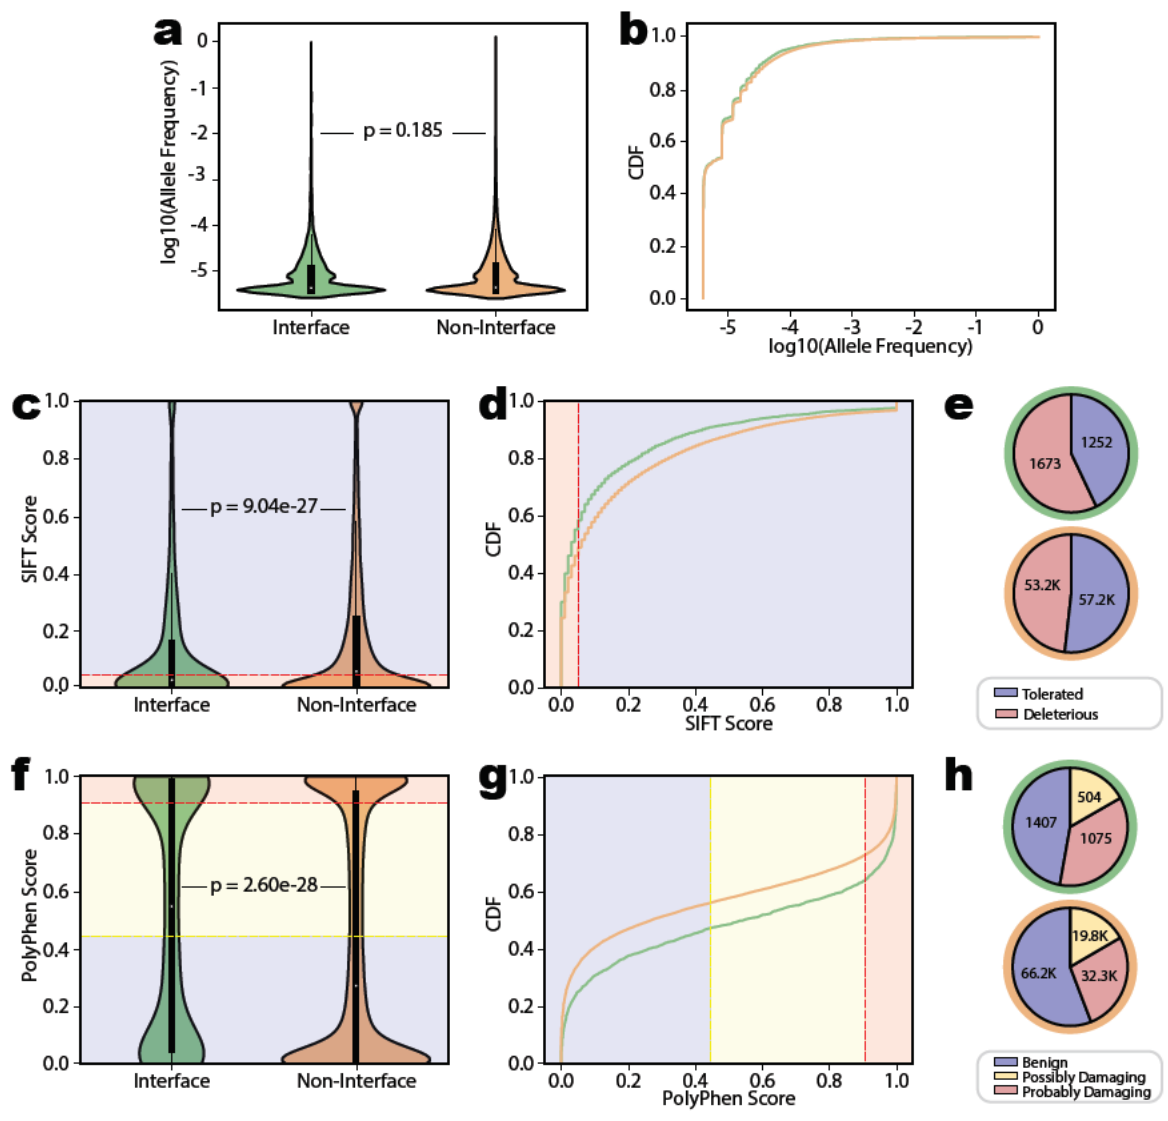



699 **Supplemental Figure 4. Summary of human population variant frequency and deleteriousness.**

700 **a, b**, Summary of allele frequency for human population variants either on or off the predicted human-  
701 viral interface presented as either a raw distribution or a cumulative density respectively. Variants in  
702 either category had roughly identical allele frequency distributions. **c, d**, Summary of the SIFT  
703 deleteriousness score for human population variants either on or off the predicted human-viral interface  
704 presented as either a raw distribution or a cumulative density respectively. Plots are colored based on  
705 the split between SIFT tolerated and deleterious categories. **e**, Pie chart breakdown of these categories.  
706 Pie chart outlines distinguish interface (green) from non-interface (orange). Population variants on the  
707 interface were significantly more likely to be classified deleterious. **f, g**, Summary of the PolyPhen  
708 deleteriousness score for human population variants either on or off the predicted human-viral interface  
709 presented as either a raw distribution or a cumulative density respectively. Plots are colored based on  
710 the split between PolyPhen benign, possibly damaging, and probably damaging categories. **e**, Pie chart  
711 breakdown of these categories. Pie chart outlines distinguish interface (green) from non-interface  
712 (orange). Population variants on the interface were significantly more likely to be classified probably  
713 damaging.
